1 **Using composite phenotypes to reveal hidden physiological**  
2 **heterogeneity and model oxygen saturation variation of high altitude**  
3 **acclimatization in a Chinese Han longitudinal cohort**

4 Yi Li<sup>1</sup>, Yi Wang<sup>1</sup>, Menghan Zhang<sup>1</sup>, Yanyun Ma<sup>1</sup>, Kun Wang<sup>1</sup>, Xiaoyu Liu<sup>1</sup>, Meng Hao<sup>1</sup>,  
5 Chang Sun<sup>1</sup>, Xiaofeng Wang<sup>1,2</sup>, Xingdong Chen<sup>1,2</sup>, Yao Zhang<sup>3</sup>, Wenyuan Duan<sup>4</sup>,  
6 Longli Kang<sup>3</sup>, Bin Qiao<sup>4</sup>, Jiucun Wang<sup>1,2</sup>, Li Jin<sup>1,2\*</sup>

7 <sup>1</sup> Ministry of Education Key Laboratory of Contemporary Anthropology,  
8 Collaborative Innovation Center for Genetics and Development, School of Life  
9 Sciences and Human Phenome Institute, Fudan University, Shanghai, China

10 <sup>2</sup> Fudan-Taizhou Institute of Health Sciences, Taizhou, China

11 <sup>3</sup> Key Laboratory of High Altitude Environment and Genes Related to Diseases of  
12 Tibet Autonomous Region, School of Medicine, Xizang Minzu University,  
13 Xianyang, China.

14 <sup>4</sup> Institute of Cardiovascular Disease, General Hospital of Jinan Military Region,  
15 Jinan, Shandong, China.

16 **\*Corresponding authors:**

17 Dr. Li Jin, School of Life Sciences, Fudan University, 2005 Songhu Road, Shanghai  
18 200438, China.

19 Tel: 8602151630607. Fax: 8602151630607. Email: [lijin@fudan.edu.cn](mailto:lijin@fudan.edu.cn)

20

21 **ABSTRACT**

22 Altitude acclimatization is the physiological process of the human body adjusting to the  
23 decreased availability of oxygen. Since several physiological processes are involved  
24 and the relation among them is complicated, analyses of single-traits is insufficient in  
25 revealing the complex mechanism of high altitude acclimatization. In this study, we  
26 examined whether these physiological responses could be studied as composite  
27 phenotypes which are represented by a linear combination of physiological traits. We  
28 developed a strategy which combines both spectral clustering and Partial Least Squares  
29 Path Modeling (PLSPM) to define composite phenotypes based on a cohort study of  
30 883 Chinese Han males. And we captured 14 composite phenotypes from 28  
31 physiological traits of high altitude acclimatization. Using these composite phenotypes,  
32 we applied k-means clustering to reveal hidden population physiological heterogeneity  
33 in high altitude acclimatization. Furthermore, we employed multivariate linear  
34 regression to systematically model (Model 1 and Model 2) oxygen saturation ( $SpO_2$ )  
35 changes in high altitude acclimatization and evaluated the model fitness performance.  
36 And composite phenotypes based Model 2 has better fitness than single-traits based  
37 Model 1 in all measurement indices. Therefore, this new strategy of defining and  
38 applying composite phenotypes can be considered as a general strategy of complex  
39 traits research, which may also shed light on genetic loci discovery and phenome  
40 analyses.

41

42

## 43 INTRODUCTION

44 Altitude acclimatization is the physiological process of the human body adjusting  
45 to the decreased availability of oxygen<sup>1</sup>. It comprises of several physiological responses  
46 in the body, including ventilation function, cardiac function, oxygen delivery function,  
47 hematology, muscle structure and metabolism, oxygen consumption and so on<sup>2,3</sup>. The  
48 most important physiological responses are in the cardiorespiratory and the hematology  
49 system<sup>2</sup>. Oxygen saturation (SpO<sub>2</sub>) reflect the most straightforward physiological  
50 changes<sup>2,4-7</sup>. The SpO<sub>2</sub> quickly decreased in three days in lowlanders ascending directly  
51 to 4,300 m, followed by a rise over weeks at altitude<sup>1,2,8,9</sup>. Another well-known  
52 physiological change is the hemoglobin concentration in the blood<sup>1,8-10</sup>. It is also  
53 known that individuals vary in both the speed and extent to altitude acclimatization<sup>1,11,12</sup>.  
54 The variations of responses across individuals provide an opportunity to explore the  
55 mechanism of altitude acclimatization<sup>1,9,11</sup>.

56 Since several physiological processes are involved and the relation among them is  
57 complicated, analyses of single-traits are insufficient to capture the complex  
58 mechanism of high altitude acclimatization<sup>1,4,9</sup>. Therefore, analysis of composite  
59 phenotypes, i.e. combinations of physiological phenotypes could become a promising  
60 alternative<sup>13-15</sup>. There are several methods to extract composite phenotypes from  
61 multiple traits, such as Principal Component Analysis (PCA)-based methods<sup>14,16,17</sup> and  
62 Partial Least Squares (PLS)-based methods<sup>9,18,19</sup>. PLS-based methods have better  
63 performance than PCA-based methods<sup>18,19</sup>. Partial Least Squares Path Modeling  
64 (PLSPM) is the PLS-based approach to Structural Equation Modeling<sup>20-22</sup>, which can  
65 also be viewed as a method for analyzing multiple relationships between groups of  
66 variables. In the PLSPM framework, there are generally two ways to define composite

67 phenotypes, i.e., latent variables<sup>9,19-22</sup>: one is using the prior knowledge and the other is  
68 using data-driven methods such as spectral clustering<sup>23,24</sup>.

69 Here, we conducted a two-phase longitudinal study of high altitude acclimatization  
70 (baseline and chronic phase) in a large sample of 883 Chinese Han young males.  
71 Overall 28 physiological phenotypes were collected from these individuals at each  
72 phase. First, we extracted composite phenotypes from physiological phenotypes in high  
73 altitude acclimatization by introducing a data-driven strategy constituting spectral  
74 clustering<sup>23,24</sup> and PLSPM<sup>20,21</sup> algorithm. Second, using these composite phenotypes,  
75 we revealed hidden population physiological heterogeneity in high altitude  
76 acclimatization using k-means clustering<sup>25</sup>. Third, we modeled the changes of SpO<sub>2</sub>  
77 during high altitude acclimatization using multivariate linear regression<sup>26</sup>, and further  
78 evaluated the advantages of composite phenotypes over single phenotypes. The  
79 workflow was summarized in **Fig. 1**, which is also the design of this study. The term  
80 phenotype used in this manuscript are referred to as “The Extended Phenotype<sup>27</sup>”.

## 81 **METHOD**

### 82 *Study overview*

83 To explore the physiological changes at two phases (baseline and chronic, **Table 1**)  
84 of high altitude acclimatization, the longitudinal data were transformed into change  
85 data<sup>28</sup>. To extract composite phenotypes from the 28 physiological traits, spectral  
86 clustering<sup>23,24,29</sup> was applied firstly (**Fig. 1**). Based on the spectral clustering results  
87 (composite phenotype structure, **Fig. 2**), PLSPM<sup>20</sup> was applied to construct and  
88 estimate the 14 composite phenotypes (**Table2, Fig. 3**). Using the 14 composite  
89 phenotypes, we applied k-means clustering algorithm<sup>23,25</sup> to explore physiological

90 heterogeneity in high altitude acclimatization (**Fig. 4**). To further investigate the  
91 physiological patterns of the two groups, pairwise Pearson correlation heatmap was  
92 shown (**Fig. 5**). To model how physiological traits systematically relate to SpO<sub>2</sub>  
93 changes in high altitude acclimatization process, two multivariate linear regression  
94 models<sup>26</sup> were constructed. Finally, to evaluate the fitness of two models, AIC<sup>30,31</sup>,  
95 BIC<sup>31,32</sup>, 10-fold CV<sup>33</sup> RMSE<sup>34</sup> and leave-one-out RMSE were measured (**Table 3**). In  
96 summary, firstly we have a problem in biology and then we tried to solve it using several  
97 effective statistical methods.

98 All the computation process of this study were realized in R (v3.3.1)<sup>35</sup> and the  
99 related figures were generated by Matlab (R2015b)<sup>36</sup>, ‘ggplot2’<sup>37</sup>, ‘igraph’<sup>38</sup> R  
100 packages. The computation process of composite phenotype scores was completed by  
101 ‘plspm’<sup>20</sup> R package. The k-means clustering was completed by ‘factoextra’<sup>39</sup> and  
102 ‘NbClust’<sup>40</sup> R package. The multivariate linear regression models were calculated by  
103 ‘stats’ R package.

#### 104 *Exploring relationship of phenotypes by spectral clustering*

105 The longitudinal data of high altitude acclimatization were firstly transformed into  
106 change data<sup>28</sup>. All the 28 physiological traits have significant (under Bonferroni  
107 correction<sup>41</sup>) changes from baseline to chronic phase at 4,300m highland. And the p  
108 values were calculated by Wilcoxon Rank-Sum Test<sup>42</sup> (**Table 1**). Based on the change  
109 data of high altitude acclimatization, spectral clustering<sup>23,24</sup> was applied. The similarity  
110 matrixes in this study were the absolute values of spearman correlation coefficient<sup>43</sup>  
111 matrixes of 28 physiological changes from baseline to chronic phase for high altitude  
112 acclimatization. The affinity matrixes were computed by applying a k-nearest neighbor  
113 filter<sup>44</sup> to build a representation of a graph connecting just the closest dataset points.

114 To compute the graph Laplacian matrix, there is also a need to get the degree matrix  
115 where each diagonal value is the degree of the respective vertex and all other positions  
116 are zero<sup>24</sup>. To choose the best number of spectral clustering, the eigenvalue gap  
117 (difference between consecutive eigenvalues of Laplacian matrix, **Supplementary Fig.**  
118 **1**) was maximized<sup>29</sup>. And the spectral clustering results were the composite phenotype  
119 structure (**Fig.1** and **Fig. 2**).

### 120 *Defining composite phenotypes by PLSPM*

121 Based on the composite phenotype structure, PLSPM<sup>20,21</sup> was further applied to  
122 construct composite phenotypes. And the latent variable scores<sup>20,22</sup> were calculated to  
123 estimate these composite phenotypes. As the 28 physiological traits were clustered as  
124 14 groups, there were also 14 composite phenotypes (LV1, LV2... LV13, LV14)  
125 accordingly. PLSPM is claimed to explain at best the residual variance of the latent  
126 variables and potentially also of the manifest variables in any regression run in the  
127 model without strong assumptions<sup>22</sup>. To check the PLSPM blocks' unidimensionality,  
128 the Cronbach's alpha, Dillon-Goldstein's rho and the first eigenvalue of the indicators'  
129 correlation matrix were calculated<sup>20,22</sup>. Each composite phenotype captures a specific  
130 aspect of high altitude acclimatization (**Table 2**, **Fig. 3** and **Supplementary Fig. 2**).

### 131 *Revealing physiological heterogeneity by k-means*

132 Based on the 14 composite phenotypes, k-means clustering was applied to explore  
133 physiological heterogeneity in high altitude acclimatization (**Fig. 4**). The optimal  
134 number of clusters is 2 (**Supplementary Fig. 3**) following the majority rule of 26  
135 indices<sup>40</sup>. The silhouette plot (**Supplementary Fig. 4**) for k-means clustering also  
136 showed that observations are well clustered<sup>45</sup>. Thus the 883 Chinese Han young males  
137 were clustered into two groups (group1 with 508 individuals and group2 with 375

138 individuals, **Fig. 4**) based on the 14 composite phenotypes of high altitude  
139 acclimatization. To further investigate the physiological patterns of the two groups,  
140 pairwise Pearson correlation<sup>46</sup> heatmap was shown (**Fig. 5**).

#### 141 *Modeling oxygen saturation variation by multivariate linear regression*

142 To model how physiological traits systematically relate to SpO<sub>2</sub> changes in high  
143 altitude acclimatization process, two multivariate linear regression models<sup>26</sup> were  
144 constructed. Model 1 is constructed by original 28 physiological traits changes from  
145 baseline to chronic phase at 4300m highland and SpO<sub>2</sub> is the dependent variable (Y).  
146 Model 2 is constructed by 13 composite phenotypes (excluding LV13, i.e., SpO<sub>2</sub>) of  
147 high altitude acclimatization, and SpO<sub>2</sub> is still the dependent variable (Y). To evaluate  
148 the fitness of two models, AIC<sup>30,31</sup>, BIC<sup>31,32</sup>, 10-fold CV<sup>33</sup> RMSE<sup>34</sup> and leave-one-out  
149 RMSE were measured (**Table 3**). We also employed Wilcoxon Rank-Sum Test<sup>42</sup> to  
150 compare the 10-fold CV MSE and leave-one-out MSE of two models (Model 1 and  
151 Model 2).

#### 152 *Participants*

153 We conducted a longitudinal cohort measurement design to investigate the  
154 responses of 28 physiological traits during high altitude acclimatization. The studied  
155 subjects were first assembled at a location with an altitude of 50 m (in China) for 10–  
156 14 days, and then they arrived at highland of above 4,300 m (in China) by train. The  
157 study is comprised of two phases: baseline phase (before going to highland) and chronic  
158 phase (living at highland for about 1 month). A structured questionnaire and  
159 physiological examination for the subjects were carried out at two phases of high  
160 altitude acclimatization respectively. The subjects with cancer, diabetes and coronary  
161 heart disease were not included in this study. Overall 883 healthy Chinese Han young

162 males aged from 17 to 36 years old were recruited. The research was approved by the  
163 Human Ethics Committee of Fudan University and written informed consent was  
164 obtained from each participant and their guardians over 18 years old.

### 165 *Physiological measurements*

166 All the subjects (883 samples, 28 traits) were measured by physicians in General  
167 Hospital of Jinan Military Region, who were previously trained to administer a  
168 questionnaire and a physical examination. The systolic blood pressures (SBP) and  
169 diastolic blood pressures (DBP) were calculated by mean of twice measurement of a  
170 standardized mercury sphygmomanometer. Maximal vital capacity (FVC) were  
171 measured by SPIDA5. Heart rate (HR) was measured by mean of twice radial pulse,  
172 SPO<sub>2</sub> was measured by Nellcor NPB-40. The body temperature (Temperature) was  
173 measured by thermometer. The blood specimens were drawn after overnight fasting for  
174 complete blood count measurement by three classification haemocytometer analyzer  
175 (Model CA-800; CIS, Japan). The blood routine indices include red blood cell count  
176 (RBC,  $\times 10^{12}/L$ ), hemoglobin (HGB, g/L), hematocrit (HCT, %), mean corpuscular  
177 volume (MCV, fL), mean corpuscular hemoglobin (MCH, pg), mean corpuscular  
178 hemoglobin concentration (MCHC, g/L), white blood cell counts (WBC,  $\times 10^9/L$ ),  
179 lymphocyte percentage (LYM%), absolute lymphocyte count (LYM#,  $\times 10^9/L$ ), blood  
180 platelet (PLT,  $\times 10^9/L$ ), mean platelet volume (MPV, fL), plateletcrit (PCT, fL), platelet  
181 distribution width (PDW, fL). The blood biochemical indices were measured by the  
182 automatic biochemical analyzer (Model 7060; Hitachi Ltd., Japan), including glutamate  
183 pyruvate transaminase (ALT, U/L), glutamic oxalacetic transaminase (AST, U/L), total  
184 bilirubin (TBIL,  $\mu\text{mol}/L$ ), direct bilirubin (DBIL,  $\mu\text{mol}/L$ ), blood urea nitrogen (BUN,  
185 mmol/L) and creatinine (CREA,  $\mu\text{mol}/L$ ). AST/ALT ratio and indirect bilirubin (IBIL,



186 umol/L) were calculated indices. The Lake Louise score (LLS) system scores<sup>47</sup> were  
187 also collected in two phases. The LLS questionnaire consists of five items: headache,  
188 dizziness, gastrointestinal symptoms, fatigue/weakness and difficulty sleeping. Each  
189 item was rated on a four-point scale (0= not at all, 1=mild, 2=moderate and 3=severe).  
190 Single item scores are added up and the maximal score is 15.

## 191 **RESULTS**

### 192 *Exploring relationship of phenotypes in high altitude acclimatization*

193 In this study, we collected the 28 physiological traits from 883 Chinese Han young  
194 males at baseline (before going to highland) and chronic (living at highland for about 1  
195 month) phases of high altitude acclimatization (**Table 1**). The studied subjects were first  
196 assembled at a location with an altitude of 50 m (in China) for 10–14 days, and then  
197 they arrived at highland of above 4,300 m (in China) by train. The subjects with cancer,  
198 diabetes and coronary heart disease were not included in this study. Overall 883 healthy  
199 Chinese Han young males aged from 17 to 36 years old were recruited. All the 28  
200 physiological traits show significant (Bonferroni correction) changes from baseline to  
201 chronic phase at 4,300m highland. These results indicate that a series of physiological  
202 phenotypes are involved in high altitude acclimatization process<sup>1,2,9</sup>. Since we are  
203 mainly concerned on the changes of these phenotypes, the longitudinal data were  
204 transformed into change data<sup>28</sup> using  $\text{Measure}_{\text{chronic-baseline}} = \text{Measure}_{\text{chronic}} - \text{Measure}_{\text{baseline}}$ .  
205 These data were used in subsequent analyses.

206 By analyzing the correlation between pairwise phenotypes, we found the  
207 phenotypes are structured (**Fig. 2**). For example, RBC, HGB and HCT have strong  
208 correlation with each other; and RBC almost has no correlation with LLS and SPO<sub>2</sub>.

209 To further explore the relationship of phenotypes, spectral clustering algorithm<sup>23,24</sup> was  
210 applied to group these 28 physiological phenotypes. To determine the number of  
211 clusters, the one with maximum eigenvalue gap (**Supplementary Fig. 1**) was chosen<sup>29</sup>.  
212 The correlation heatmap (**Fig. 2**) showed the spectral clustering results of 28  
213 physiological phenotypes, and they were clustered into 14 groups (i.e. composite  
214 phenotype structure, **Fig. 2**).

### 215 *Defining composite phenotypes of high altitude acclimatization*

216 Based on the revealed aforementioned structure, PLSM<sup>20-22</sup> was applied to extract  
217 composite phenotypes of high altitude acclimatization. Overall 14 composite  
218 phenotypes were extracted as the latent variables<sup>20</sup> (LV1, LV2... LV13, LV14). Each  
219 composite phenotype is a linear combination of their manifest variables<sup>21</sup>, and captures  
220 a specific aspect of high altitude acclimatization (**Fig. 3, Table 2** and **Supplementary**  
221 **Fig. 2**). The LV5 explained the variance of RBC, HCT and HGB, which mainly reflect  
222 the number of red cells (Dillon-Goldstein's rho = 0.93, **Table 2** and **Fig. 3**). The Dillon-  
223 Goldstein's rho focuses on the variance of the sum of variables in the block of latent  
224 variable<sup>20,22</sup>. The LV6 explained the variance of MCH, MCHC, MPV and MCV, which  
225 reflect the hemoglobin concentration. As the changes of MCH and MCHC were  
226 negatively related to MPV and MCV, we changed both MCH and MCHC signs to keep  
227 loadings positive<sup>20</sup>. The LV12 is equivalent to single-phenotype LLS and the LV13  
228 represents single-phenotype SPO<sub>2</sub>.

### 229 *Revealing physiological heterogeneity in high altitude acclimatization*

230 To explore physiological heterogeneity in high altitude acclimatization, we applied  
231 k-means clustering algorithm<sup>23,25</sup> on individuals using the 14 composite phenotypes.  
232 Thus the 883 individuals could be clustered into two groups (group 1 with 508

233 individuals and group 2 with 375 individuals, **Fig. 4, Supplementary Fig. 4** and  
234 **Supplementary Fig. 5**) based on the 14 composite phenotypes of high altitude  
235 acclimatization. The separation of two groups of the individuals are mainly contributed  
236 by hemoglobin concentration (LV6, Wilcox Rank Sum test's pvalue =  $3.36 \times 10^{-90}$ ),  
237 number of red cells (LV5) and number of platelets (LV7) (**Supplementary Table 1** and  
238 **Supplementary Fig. 5**). The results demonstrate physiological heterogeneity in high  
239 altitude acclimatization among these sampled individuals, especially in the phenotypes  
240 related with oxygen carrying capacity<sup>1,48,49</sup> including hemoglobin concentration,  
241 number of red cells, platelet counts and so on. The increases in red cell number and  
242 hemoglobin concentration improve the oxygen carrying capacity of the blood to  
243 compensate for the reduction in oxygen saturation<sup>1,50,51</sup>.

244 To further characterize the relationship of the 14 composite phenotypes in each  
245 group, we calculated the pairwise Pearson correlation<sup>46</sup> (**Fig. 5**). For instance, there is  
246 significant correlation (Pearson's  $r = 0.12$ , pvalue = 0.006, **Supplementary Table 2**)  
247 between LV6 and LV13 in group 1, but no correlation between them in group 2  
248 (Pearson's  $r = -0.03$ , pvalue = 0.51, **Supplementary Table 3**). To compare the  
249 difference of these two Pearson correlation coefficient, fisher's z transformation<sup>52-55</sup>  
250 were applied (pvalue=0.02, **Supplementary Table 4**). There is negative correlation  
251 (Pearson's  $r = -0.2$ ) between LV5 and LV7 in group 1, while in contrast, we observed  
252 positive correlation (Pearson's  $r = 0.17$ , fisher's z transformation pvalue =  $5.58 \times 10^{-8}$ )  
253 between them in group 2. Thus we can compare the correlation networks of multiple  
254 physiological traits intuitively and focus on composite phenotypes not their manifest  
255 variables.

256 ***Modeling oxygen saturation variation of high altitude acclimatization***

257 Oxygen saturation (SpO<sub>2</sub>) reflect the most straightforward physiological change of  
258 high altitude acclimatization<sup>2,4,5,7</sup>. To model how other physiological traits  
259 systematically relate to SpO<sub>2</sub> changes in high altitude acclimatization process, we  
260 constructed two multivariate linear regression models. Model 1 is constructed by  
261 original 28 physiological traits changes from baseline to chronic phase at 4,300m  
262 highland and SpO<sub>2</sub> is the dependent variable (Y). To compare with this model, Model  
263 2 is constructed by 13 composite phenotypes (excluding LV13, i.e., SpO<sub>2</sub>) of high  
264 altitude acclimatization.

265 To evaluate the goodness of fit of two models, the Akaike information criterion  
266 (AIC)<sup>30,31</sup>, Bayesian information criterion (BIC)<sup>31,32</sup>, 10-fold cross validation (CV)<sup>33</sup>  
267 root-mean-square error (RMSE)<sup>34</sup> and leave-one-out RMSE were measured (**Table 3**).  
268 Model 2 has better fitness than Model 1 in all measurement indices (**Table 3**),  
269 suggesting that the composite phenotypes is better performed in capturing variation of  
270 high altitude acclimation. From the multivariate regression result of Model 2, we also  
271 found that LV12 (LLS) is the most significant ( $\beta = -0.29$ , pvalue = 0.04,  
272 **Supplementary Table 5**) trait that influence SpO<sub>2</sub>. SpO<sub>2</sub> has been well studied as  
273 predictors/indicators of AMS or LLS<sup>1,2,4,10,56-59</sup>. And those individuals who successfully  
274 maintain their oxygen saturation at rest, most likely do not develop AMS<sup>2,4,57</sup>.

## 275 **DISCUSSION**

276 In this study, we developed a data-driven strategy (**Fig. 1**) to extract composite  
277 phenotypes from multiple physiological phenotypes of high altitude acclimatization in  
278 a large-scale Chinese Han longitudinal cohort. We first explore the relationship of  
279 phenotypes of high-altitude acclimatization. And then we extracted 14 composite  
280 phenotypes from 28 physiological traits changes of high-altitude acclimatization. This

281 strategy could be applied to other complex traits, for example, immune diseases, cardio  
282 metabolic traits or other complex diseases.

283 Altitude acclimatization comprises a number of physiological responses to mitigate  
284 the effects of hypoxia<sup>1,7</sup>. There are many methods to analyze longitudinal data, such as  
285 linear mixed models<sup>60</sup> and data transformation<sup>28</sup>. Since we are mainly concerned on the  
286 changes of these phenotypes, transforming the longitudinal data into change data is also  
287 a promising alternative<sup>2,9,28,61</sup>. Thus the transformed data was used in this study.

288 Since individual single-traits are insufficient to reflect the complex mechanism of  
289 high altitude acclimatization<sup>1,4,9</sup>, analysis of composite phenotypes could become a  
290 promising alternative<sup>13-15</sup>. Among several methods, PLS-based composite phenotypes  
291 have relatively interpretable biological meanings<sup>9</sup>. In particular, PLSPM can also be  
292 viewed as a method for analyzing multiple relationships between blocks of variables<sup>20</sup>.

293 Generally, there are two ways to define composite phenotypes in PLSPM  
294 framework<sup>9,22</sup>: one is using the prior specific domain knowledge and the other is using  
295 some data-driven methods like clustering. In our study, we employed the generalized  
296 standard spectral clustering<sup>23,24</sup> to find the composite phenotype structure (**Fig. 2**) for  
297 high-altitude acclimatization.

298 This study included 28 physiological phenotypes which covered respiratory  
299 function, cardiac function, oxygen delivery function, hematology, oxygen saturation,  
300 kidney function, liver function, LLS and so on. However, there are still traits not  
301 involved in this study, such as muscle metabolism, oxygen consumption,  
302 electrocardiogram, electroencephalogram, organism metabolism and so on. And the  
303 data of this study was collected at two time points of high altitude acclimatization,  
304 which may be incomplete. The subjects in this study are all young males, the

305 physiological responses of females may be quite different. More importantly, other  
306 factors such as genetic variations, should be studied to further understand potential  
307 physiological mechanism of high altitude acclimatization<sup>4,7</sup>.

308 In summary, we have developed a strategy constituting both spectral clustering and  
309 PLSPM to define composite phenotypes. And we effectively used this strategy to  
310 capture 14 composite phenotypes from 28 physiological phenotypes of high altitude  
311 acclimatization. The 14 composite phenotypes have clear meaning in physiology and  
312 explain most of variance in statistics. Based on these composite phenotypes, we first  
313 observed physiological heterogeneity among individuals in high altitude  
314 acclimatization. In addition, we compared the performance of composite phenotypes  
315 and regular phenotypes in predicting SpO<sub>2</sub> changes. Both analyses showed that the  
316 composite phenotypes is better performed in capturing variation of high altitude  
317 acclimation. To conclude, this new strategy of defining and applying composite  
318 phenotypes can be considered as a general strategy of complex traits research<sup>62</sup>,  
319 especially in phenome analyses<sup>63,64</sup>.

## 320 **ACKNOWLEDGEMENTS**

321 This research was supported by National Science Foundation of China (31330038,  
322 31521003, 31460286), Ministry of Science and Technology (2015FY1117000), Science  
323 and Technology Committee of Shanghai Municipality (16JC1400500), Shanghai  
324 Municipal Science and Technology Major Project (2017SHZDZX01) and the 111  
325 Project (B13016). The computations involved in this study were supported by the Fudan  
326 University High-End Computing Center.

## 327 **CONTRIBUTIONS**

328 YL and LJ conceived the idea and contributed to writing of the paper. YL, YW, MHZ  
329 and LJ contributed the theoretical analysis. YL, YYM, KW, YZ, LLK, XDC, WYD,  
330 BQ, JCW and LJ contributed the data collection and data cleaning. YL, YW, MHZ,  
331 YYM, KW, XYL, WLP, CS, JCW and LJ contributed to scientific discussion and  
332 manuscript writing. YL and LJ contributed to final revision of the paper.

333 **COMPETING INTERESTS:** The authors declare no competing financial interests.

334 **FUNDING:** This research was supported by National Science Foundation of China  
335 (31330038, 31521003, 31460286), Ministry of Science and Technology  
336 (2015FY1117000), Science and Technology Committee of Shanghai Municipality  
337 (16JC1400500), Shanghai Municipal Science and Technology Major Project  
338 (2017SHZDZX01) and the 111 Project (B13016).

## 339 REFERENCE

- 340 1 West, J. B., Schoene, R. B., Luks, A. M. & Milledge, J. S. *High altitude medicine and*  
341 *physiology 5E*. (CRC Press, 2012).
- 342 2 Muza, S. R., Beidleman, B. A. & Fulco, C. S. Altitude preexposure recommendations for  
343 inducing acclimatization. *High Alt Med Biol* **11**, 87-92, doi:10.1089/ham.2010.1006 (2010).
- 344 3 Martin, D. S., Levett, D. Z., Grocott, M. P. & Montgomery, H. E. Variation in human  
345 performance in the hypoxic mountain environment. *Exp Physiol* **95**, 463-470,  
346 doi:10.1113/expphysiol.2009.047589 (2010).
- 347 4 West, J. B., American College of, P. & American Physiological, S. The physiologic basis of  
348 high-altitude diseases. *Ann Intern Med* **141**, 789-800 (2004).
- 349 5 Martin, D. S. *et al.* Systemic oxygen extraction during exercise at high altitude. *Br J Anaesth*  
350 **114**, 677-682, doi:10.1093/bja/aeu404 (2015).
- 351 6 Peacock, A. J. & Jones, P. L. Gas exchange at extreme altitude: results from the British 40th  
352 Anniversary Everest Expedition. *European Respiratory Journal* **10**, 1439-1444,  
353 doi:10.1183/09031936.97.10071439 (1997).
- 354 7 West, J. B. Physiological Effects of Chronic Hypoxia. *N Engl J Med* **376**, 1965-1971,  
355 doi:10.1056/NEJMra1612008 (2017).
- 356 8 Lundby, C., Calbet, J. A., van Hall, G., Saltin, B. & Sander, M. Pulmonary gas exchange at  
357 maximal exercise in Danish lowlanders during 8 wk of acclimatization to 4,100 m and in  
358 high-altitude Aymara natives. *American journal of physiology. Regulatory, integrative and*  
359 *comparative physiology* **287**, R1202-1208, doi:10.1152/ajpregu.00725.2003 (2004).

- 360 9 Peng, Q. Q. *et al.* Physiological responses and evaluation of effects of BMI, smoking and  
361 drinking in high altitude acclimatization: a cohort study in Chinese Han young males. *PLoS*  
362 *One* **8**, e79346, doi:10.1371/journal.pone.0079346 (2013).
- 363 10 Parks, T., Brierley, G., Wilson, C. & Wolff, C. in *Proceedings of The Physiological Society*.  
364 (The Physiological Society).
- 365 11 Brown, J. P. R. & Grocott, M. P. W. Humans at altitude: physiology and pathophysiology.  
366 *Continuing Education in Anaesthesia, Critical Care & Pain* **13**, 17-22,  
367 doi:10.1093/bjaceaccp/mks047 (2013).
- 368 12 Clarke, A. *Harper's Practical Genetic Counselling*, (CRC Press, 2016).
- 369 13 Inglese, P. *et al.* Deep learning and 3D-DESI imaging reveal the hidden metabolic  
370 heterogeneity of cancer. *Chem Sci* **8**, 3500-3511, doi:10.1039/c6sc03738k (2017).
- 371 14 Ried, J. S. *et al.* A principal component meta-analysis on multiple anthropometric traits  
372 identifies novel loci for body shape. *Nat Commun* **7**, 13357, doi:10.1038/ncomms13357  
373 (2016).
- 374 15 Holmes, E. *et al.* Human metabolic phenotype diversity and its association with diet and  
375 blood pressure. *Nature* **453**, 396-400, doi:10.1038/nature06882 (2008).
- 376 16 Yang, J. *et al.* Conditional and joint multiple-SNP analysis of GWAS summary statistics  
377 identifies additional variants influencing complex traits. *Nat Genet* **44**, 369-375, S361-363,  
378 doi:10.1038/ng.2213 (2012).
- 379 17 Aschard, H. *et al.* Maximizing the power of principal-component analysis of correlated  
380 phenotypes in genome-wide association studies. *Am J Hum Genet* **94**, 662-676,  
381 doi:10.1016/j.ajhg.2014.03.016 (2014).
- 382 18 Li, F. *et al.* A powerful latent variable method for detecting and characterizing gene-based  
383 gene-gene interaction on multiple quantitative traits. *BMC Genet* **14**, 89,  
384 doi:10.1186/1471-2156-14-89 (2013).
- 385 19 Zhang, X. *et al.* A PLSPM-based test statistic for detecting gene-gene co-association in  
386 genome-wide association study with case-control design. *PLoS One* **8**, e62129,  
387 doi:10.1371/journal.pone.0062129 (2013).
- 388 20 Sanchez, G. PLS path modeling with R. *Berkeley: Trowchez Editions* (2013).
- 389 21 Tenenhaus, M., Vinzi, V. E., Chatelin, Y.-M. & Lauro, C. PLS path modeling. *Computational*  
390 *statistics & data analysis* **48**, 159-205 (2005).
- 391 22 by Endo, T.-B. D. M. Handbook of partial least squares.
- 392 23 Hastie, T., Tibshirani, R. & Friedman, J. (Springer, 2009).
- 393 24 Von Luxburg, U. A tutorial on spectral clustering. *Statistics and computing* **17**, 395-416  
394 (2007).
- 395 25 Macqueen, J. B. in *Proceedings of the Fifth Berkeley Symposium on Math, Statistics, and*  
396 *Probability*. 281-297 (University of California Press).
- 397 26 Freedman, D. *Statistical Models: Theory and Practice*. (Cambridge University Press, 2009).
- 398 27 Dawkins, R. Replicator selection and the extended phenotype. *Z Tierpsychol* **47**, 61-76  
399 (1978).
- 400 28 Fitzmaurice, G. M., Laird, N. M. & Ware, J. H. *Applied longitudinal analysis*. Vol. 998 (John  
401 Wiley & Sons, 2012).
- 402 29 Zelnik-Manor, L. & Perona, P. Self-tuning spectral clustering. (2005).
- 403 30 Akaike, H. in *Selected Papers of Hirotugu Akaike* 199-213 (Springer, 1998).



- 404 31 Aho, K., Derryberry, D. & Peterson, T. Model selection for ecologists: the worldviews of  
405 AIC and BIC. *Ecology* **95**, 631-636 (2014).
- 406 32 Schwarz, G. Estimating the dimension of a model. *The annals of statistics* **6**, 461-464  
407 (1978).
- 408 33 Kohavi, R. in *Ijcai.* 1137-1145 (Stanford, CA).
- 409 34 Hyndman, R. J. & Koehler, A. B. Another look at measures of forecast accuracy.  
410 *International Journal of Forecasting* **22**, 679-688, doi:10.1016/j.ijforecast.2006.03.001  
411 (2006).
- 412 35 Team, R. C. R: A language and environment for statistical computing. (2013).
- 413 36 Works, M. Matlab User Manual Version r2015b. *Math Works Incorporation, Natick, MA*  
414 (2015).
- 415 37 Wickham, H. *ggplot2: elegant graphics for data analysis.* (Springer Science & Business  
416 Media, 2009).
- 417 38 Csardi, G. & Nepusz, T. The igraph software package for complex network research.  
418 *InterJournal, Complex Systems* **1695**, 1-9 (2006).
- 419 39 Kassambara, A. & Mundt, F. Factoextra: extract and visualize the results of multivariate  
420 data analyses. *R package version 1* (2016).
- 421 40 Charrad, M., Ghazzali, N., Boiteau, V. & Niknafs, A. Nbclust: An R Package for Determining  
422 the Relevant Number of Clusters in a Data Set. *J Stat Softw* **61**, 1-36 (2014).
- 423 41 Goeman, J. J. & Solari, A. Multiple hypothesis testing in genomics. *Stat Med* **33**, 1946-  
424 1978, doi:10.1002/sim.6082 (2014).
- 425 42 Wilcoxon, F. Individual Comparisons by Ranking Methods. *Biometrics Bulletin* **1**, 80,  
426 doi:10.2307/3001968 (1945).
- 427 43 Myers, J. L., Well, A. & Lorch, R. F. *Research design and statistical analysis.* (Routledge,  
428 2010).
- 429 44 Altman, N. S. An Introduction to Kernel and Nearest-Neighbor Nonparametric Regression.  
430 *The American Statistician* **46**, 175, doi:10.2307/2685209 (1992).
- 431 45 Rousseeuw, P. J. Silhouettes: A graphical aid to the interpretation and validation of cluster  
432 analysis. *J Comput Appl Math* **20**, 53-65, doi:10.1016/0377-0427(87)90125-7 (1987).
- 433 46 Pearson, K. Note on regression and inheritance in the case of two parents. *Proceedings*  
434 *of the Royal Society of London* **58**, 240-242 (1895).
- 435 47 Roach, R., Bartsch, P., Hackett, P. & Oelz, O. The Lake Louise acute mountain sickness  
436 scoring system. *Hypoxia and molecular medicine* **272**, 4 (1993).
- 437 48 Calbet, J. A. L. *et al.* Effect of blood haemoglobin concentration on Vo<sub>2</sub>max and  
438 cardiovascular function in lowlanders acclimatised to 5260 m. *The Journal of Physiology*  
439 **545**, 715-728, doi:10.1113/jphysiol.2002.029108 (2002).
- 440 49 Vij, A. G. Effect of prolonged stay at high altitude on platelet aggregation and fibrinogen  
441 levels. *Platelets* **20**, 421-427, doi:10.1080/09537100903116516 (2009).
- 442 50 Hackett, P. H., Schoene, R. B., Winslow, R. M., Peters, R. M., Jr. & West, J. B. Acetazolamide  
443 and exercise in sojourners to 6,300 meters--a preliminary study. *Med Sci Sports Exerc* **17**,  
444 593-597 (1985).
- 445 51 Winslow, R. M. R. M. & Monge, C. *Hypoxia, polycythemia and chronic mountain sickness.*  
446 (1987).
- 447 52 Fisher, R. A. On the probable error of a coefficient of correlation deduced from a small

448 sample. *Metron* **1**, 3-32 (1921).  
449 53 Fisher, R. A. in *Breakthroughs in Statistics* 66-70 (Springer, 1992).  
450 54 Cohen, J., Cohen, P., West, S. G. & Aiken, L. S. *Applied multiple regression/correlation*  
451 *analysis for the behavioral sciences*. (Routledge, 2013).  
452 55 Diedenhofen, B. & Musch, J. cocor: a comprehensive solution for the statistical comparison  
453 of correlations. *PLoS One* **10**, e0121945, doi:10.1371/journal.pone.0121945 (2015).  
454 56 Burtscher, M., Szubski, C. & Faulhaber, M. Prediction of the susceptibility to AMS in  
455 simulated altitude. *Sleep Breath* **12**, 103-108, doi:10.1007/s11325-007-0131-0 (2008).  
456 57 Karinen, H. M., Peltonen, J. E., Kahonen, M. & Tikkanen, H. O. Prediction of acute mountain  
457 sickness by monitoring arterial oxygen saturation during ascent. *High Alt Med Biol* **11**,  
458 325-332, doi:10.1089/ham.2009.1060 (2010).  
459 58 Koehle, M. S., Guenette, J. A. & Warburton, D. E. Oximetry, heart rate variability, and the  
460 diagnosis of mild-to-moderate acute mountain sickness. *Eur J Emerg Med* **17**, 119-122,  
461 doi:10.1097/MEJ.0b013e32832fa099 (2010).  
462 59 Brierley, G., Parks, T. & Wolff, C. in *Oxygen Transport to Tissue XXXIII* 207-212  
463 (Springer, 2012).  
464 60 Verbeke, G. & Molenberghs, G. *Linear mixed models for longitudinal data*. (Springer  
465 Science & Business Media, 2009).  
466 61 Richalet, J. P., Larmignat, P., Poitrine, E., Letournel, M. & Canoui-Poitrine, F. Physiological  
467 risk factors for severe high-altitude illness: a prospective cohort study. *Am J Respir Crit*  
468 *Care Med* **185**, 192-198, doi:10.1164/rccm.201108-1396OC (2012).  
469 62 Wei, W. H., Hemani, G. & Haley, C. S. Detecting epistasis in human complex traits. *Nat Rev*  
470 *Genet* **15**, 722-733, doi:10.1038/nrg3747 (2014).  
471 63 Houle, D., Govindaraju, D. R. & Omholt, S. Phenomics: the next challenge. *Nat Rev Genet*  
472 **11**, 855-866, doi:10.1038/nrg2897 (2010).  
473 64 Zbuk, K. M. & Eng, C. Cancer phenomics: RET and PTEN as illustrative models. *Nat Rev*  
474 *Cancer* **7**, 35-45, doi:10.1038/nrc2037 (2007).  
475  
476

477 **FIGURE LEGENDS:**

478 **Figure 1.** The workflow and design of this study.

479 **Figure 2.** The absolute value of spearman correlation heatmap of 28 physiological  
480 phenotypes. The spearman correlation coefficient ranges from 0 (dark blue) to 1 (dark  
481 red). The spectral clustering results are marked by white boxes. For example, SBP and  
482 DBP are grouped together, and their absolute spearman correlation coefficient is about  
483 0.6 (yellow-green color).

484 **Figure 3.** The PLSPM loadings of 14 composite phenotypes of high altitude  
485 acclimatization. The 14 composite phenotypes (LV1, ..., LV14) are represented by 14  
486 different colors, and the height of each colorful bar is the loading (correlation) of each  
487 composite phenotype. Acceptable values for the loadings are values greater than 0.7  
488 (threshold line), indicating that more than 49% ( $0.7 \times 0.7$ ) of the variability in a single  
489 phenotype (like SBP or DBP) is captured by its composite phenotype (like LV3).

490 **Figure 4.** K-means clustering results on individuals using the 14 composite phenotypes  
491 (LVs). The 883 individuals are clustered as two groups (group 1 with 508 individuals  
492 and group 2 with 375 individuals) based on their composite phenotype scores. The PCA  
493 plot is just visualization of the k-means clustering results (group 1 with red color and  
494 group 2 with blue color accordingly).

495 **Figure 5.** The pairwise Pearson correlation heatmap of 14 composite phenotypes  
496 (LV1, ..., LV14) of two groups. The Pearson correlation coefficient ranges from -1 (blue)  
497 to 1 (red). The left figure represents the Pearson correlation heatmap of 14 LVs of group  
498 1 and the right figure represents the Pearson correlation heatmap of 14 LVs of group 2.

499 **Supplementary Figure 1.** The eigenvalue gap of spectral clustering. The eigenvalue  
500 gap was maximized to choose the best number of spectral clustering (red line). And the  
501 best clustering number is 14.

502 **Supplementary Figure 2.** The 14 composite phenotypes of high altitude  
503 acclimatization. The numbers on the arrows are the PLSPM loadings of 14 composite  
504 phenotypes, which is the same as Figure 3.

505 **Supplementary Figure 3.** The optimal number of k-means clustering on individuals.  
506 The optimal number of clusters is 2 following the majority rule of total 26 clustering  
507 indices.

508 **Supplementary Figure 4.** The silhouette plot of k-means clustering on individuals.  
509 Silhouette values range from 1 to -1, when silhouette value is close to 1 indicating that  
510 the individuals are well clustered. The silhouette plot for k-means clustering showed  
511 that observations are well clustered.

512 **Supplementary Figure 5.** The histogram plot and density plot of each LV (14 LVs)  
513 between 2 groups (group 1 with red color and group 2 with blue color). And we further  
514 calculated the Wilcoxon Rank Sum test pvalue (the title of histogram plot) of each LV  
515 between 2 groups.

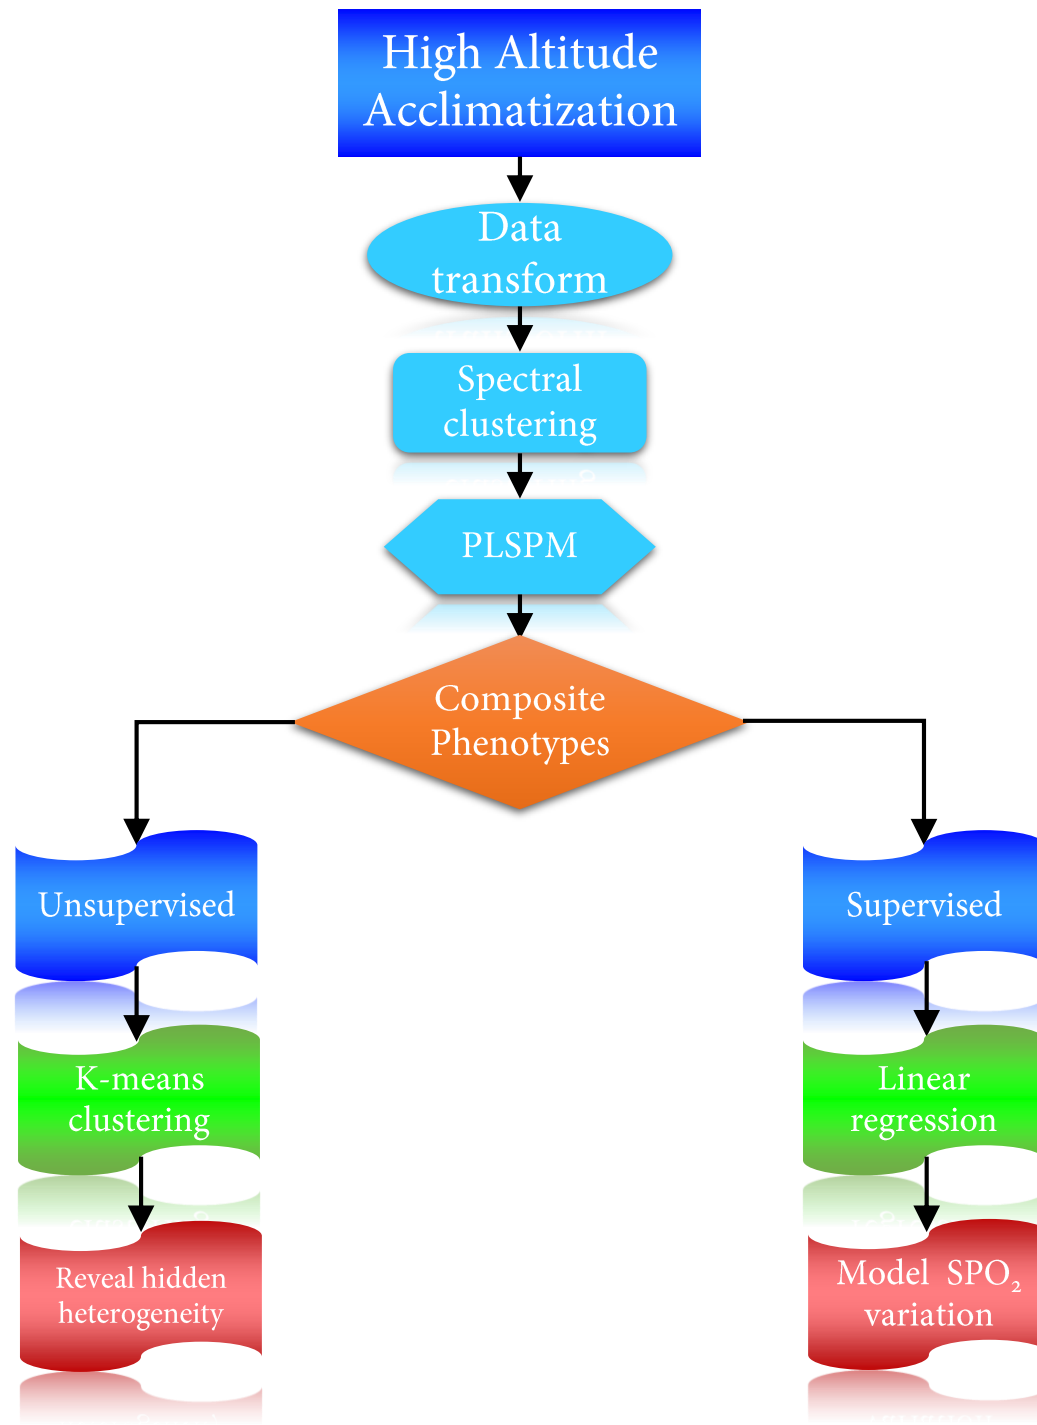



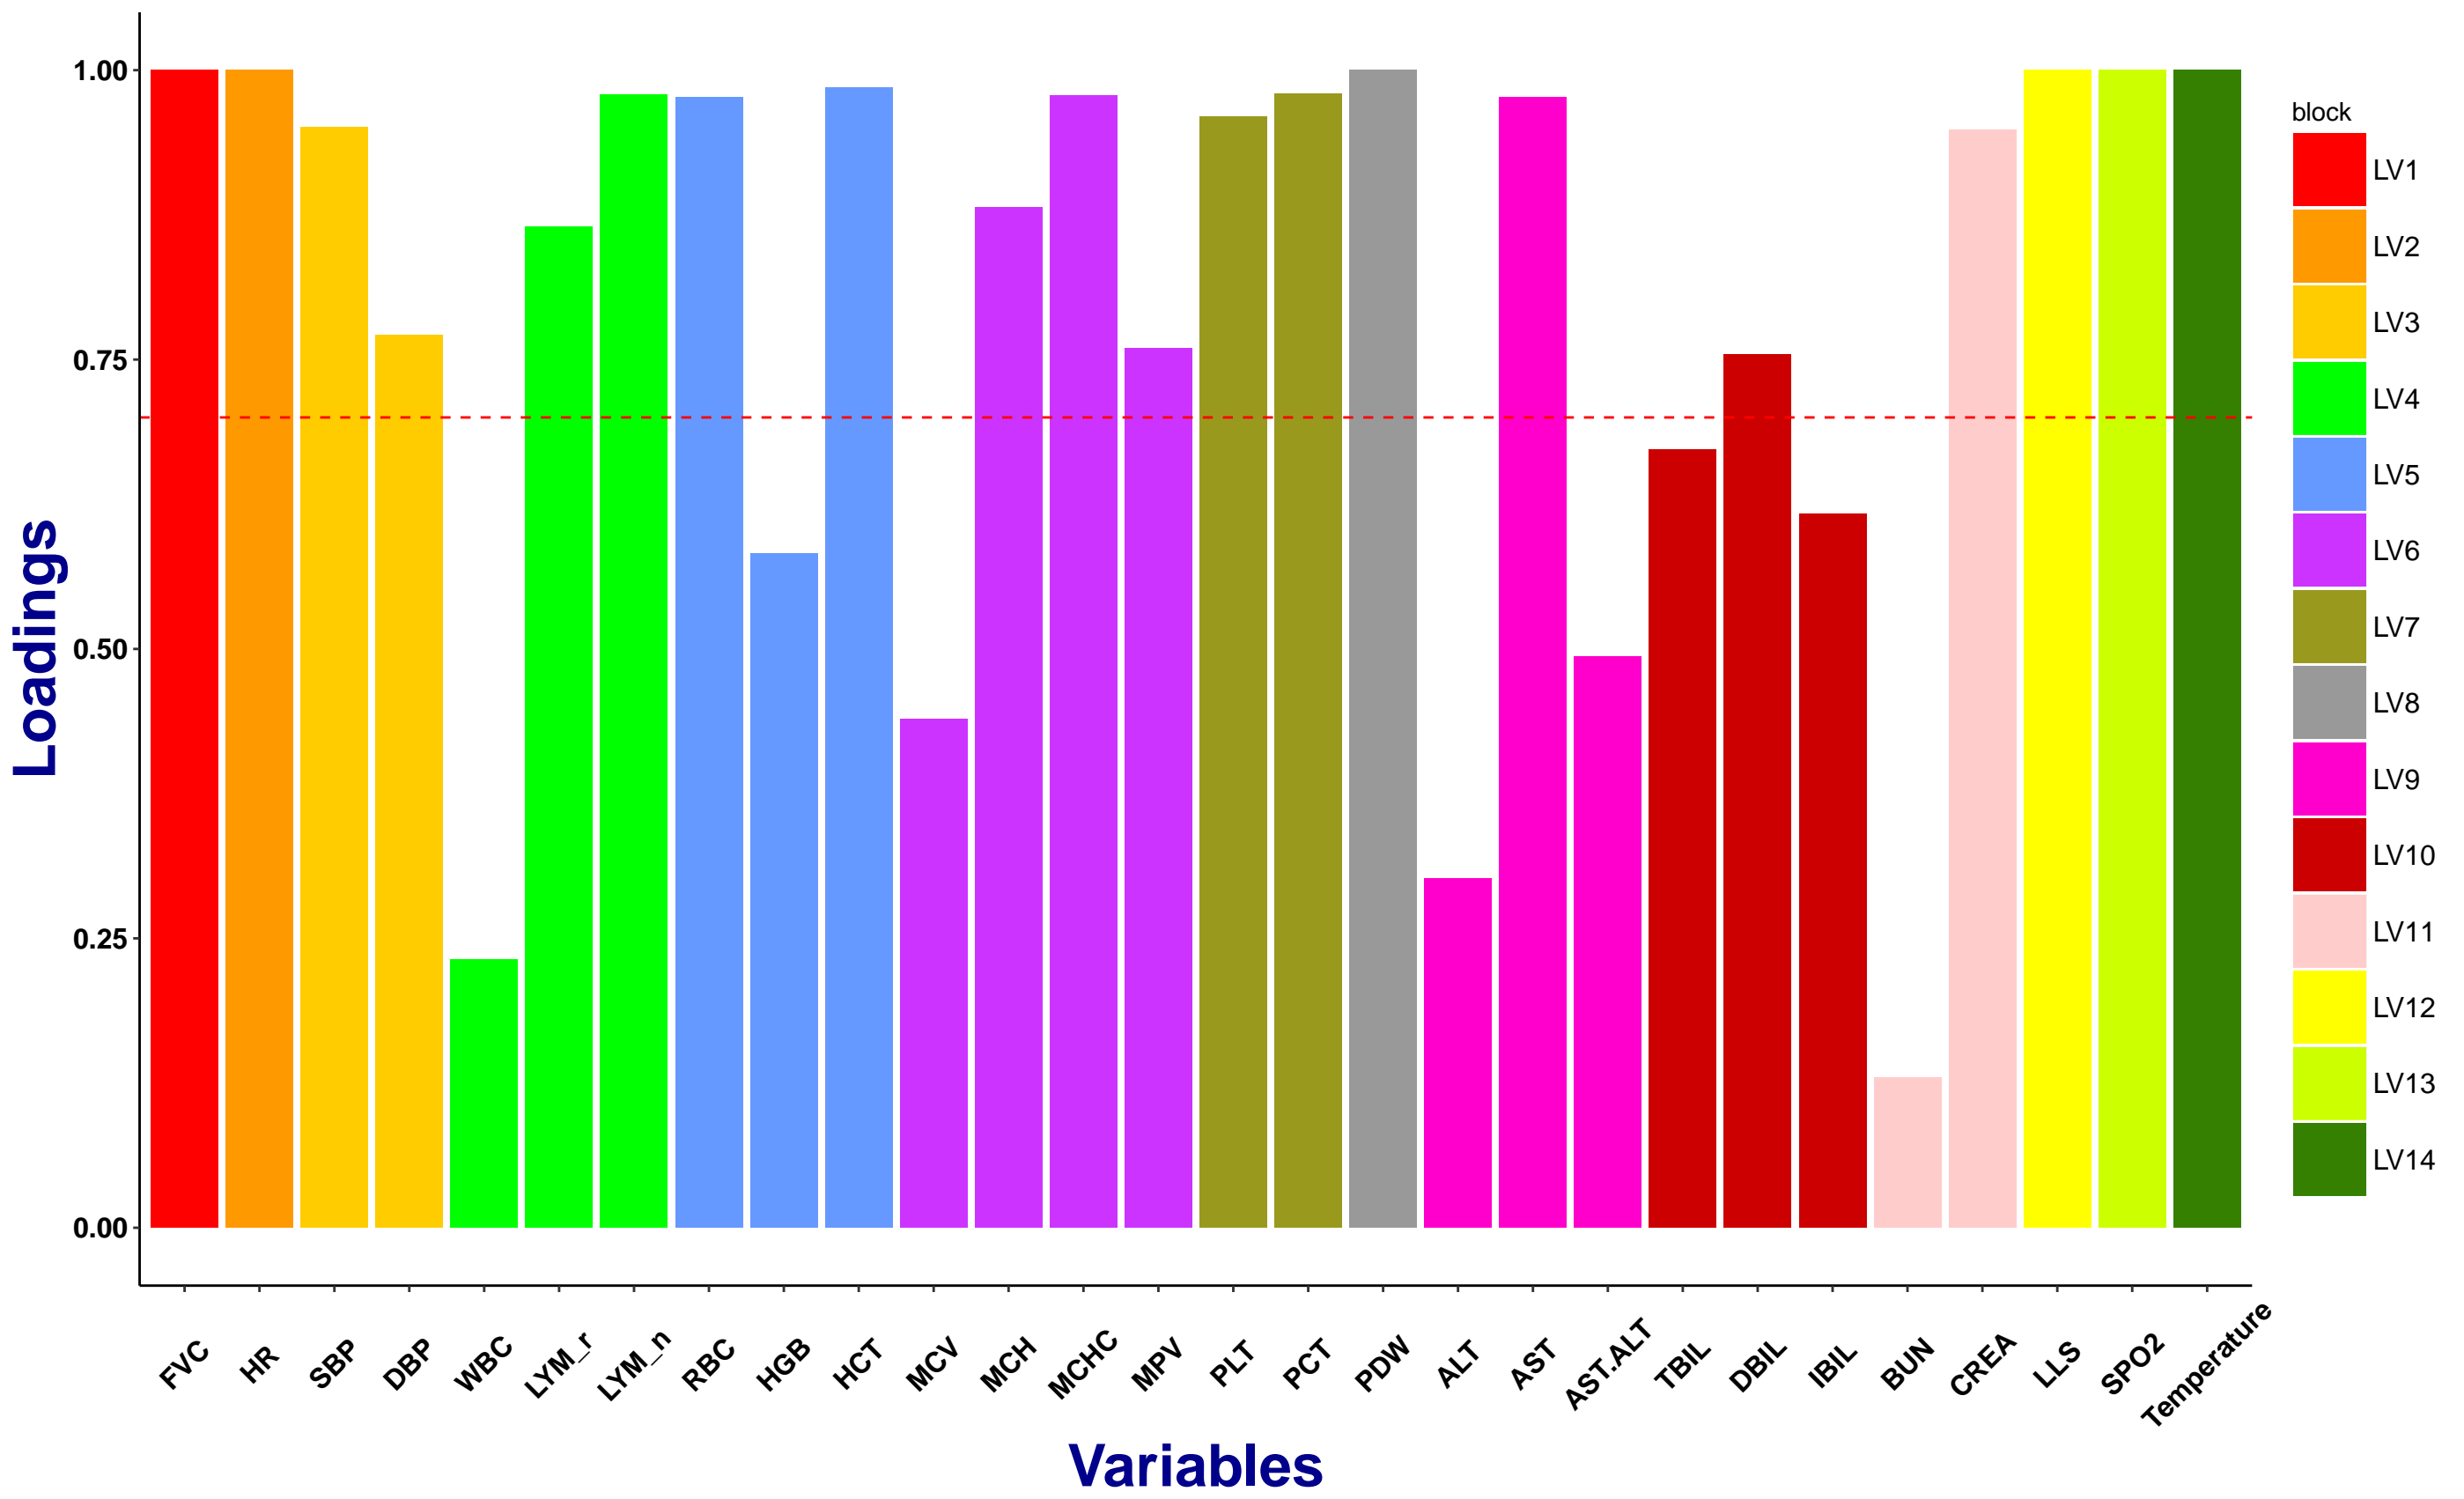

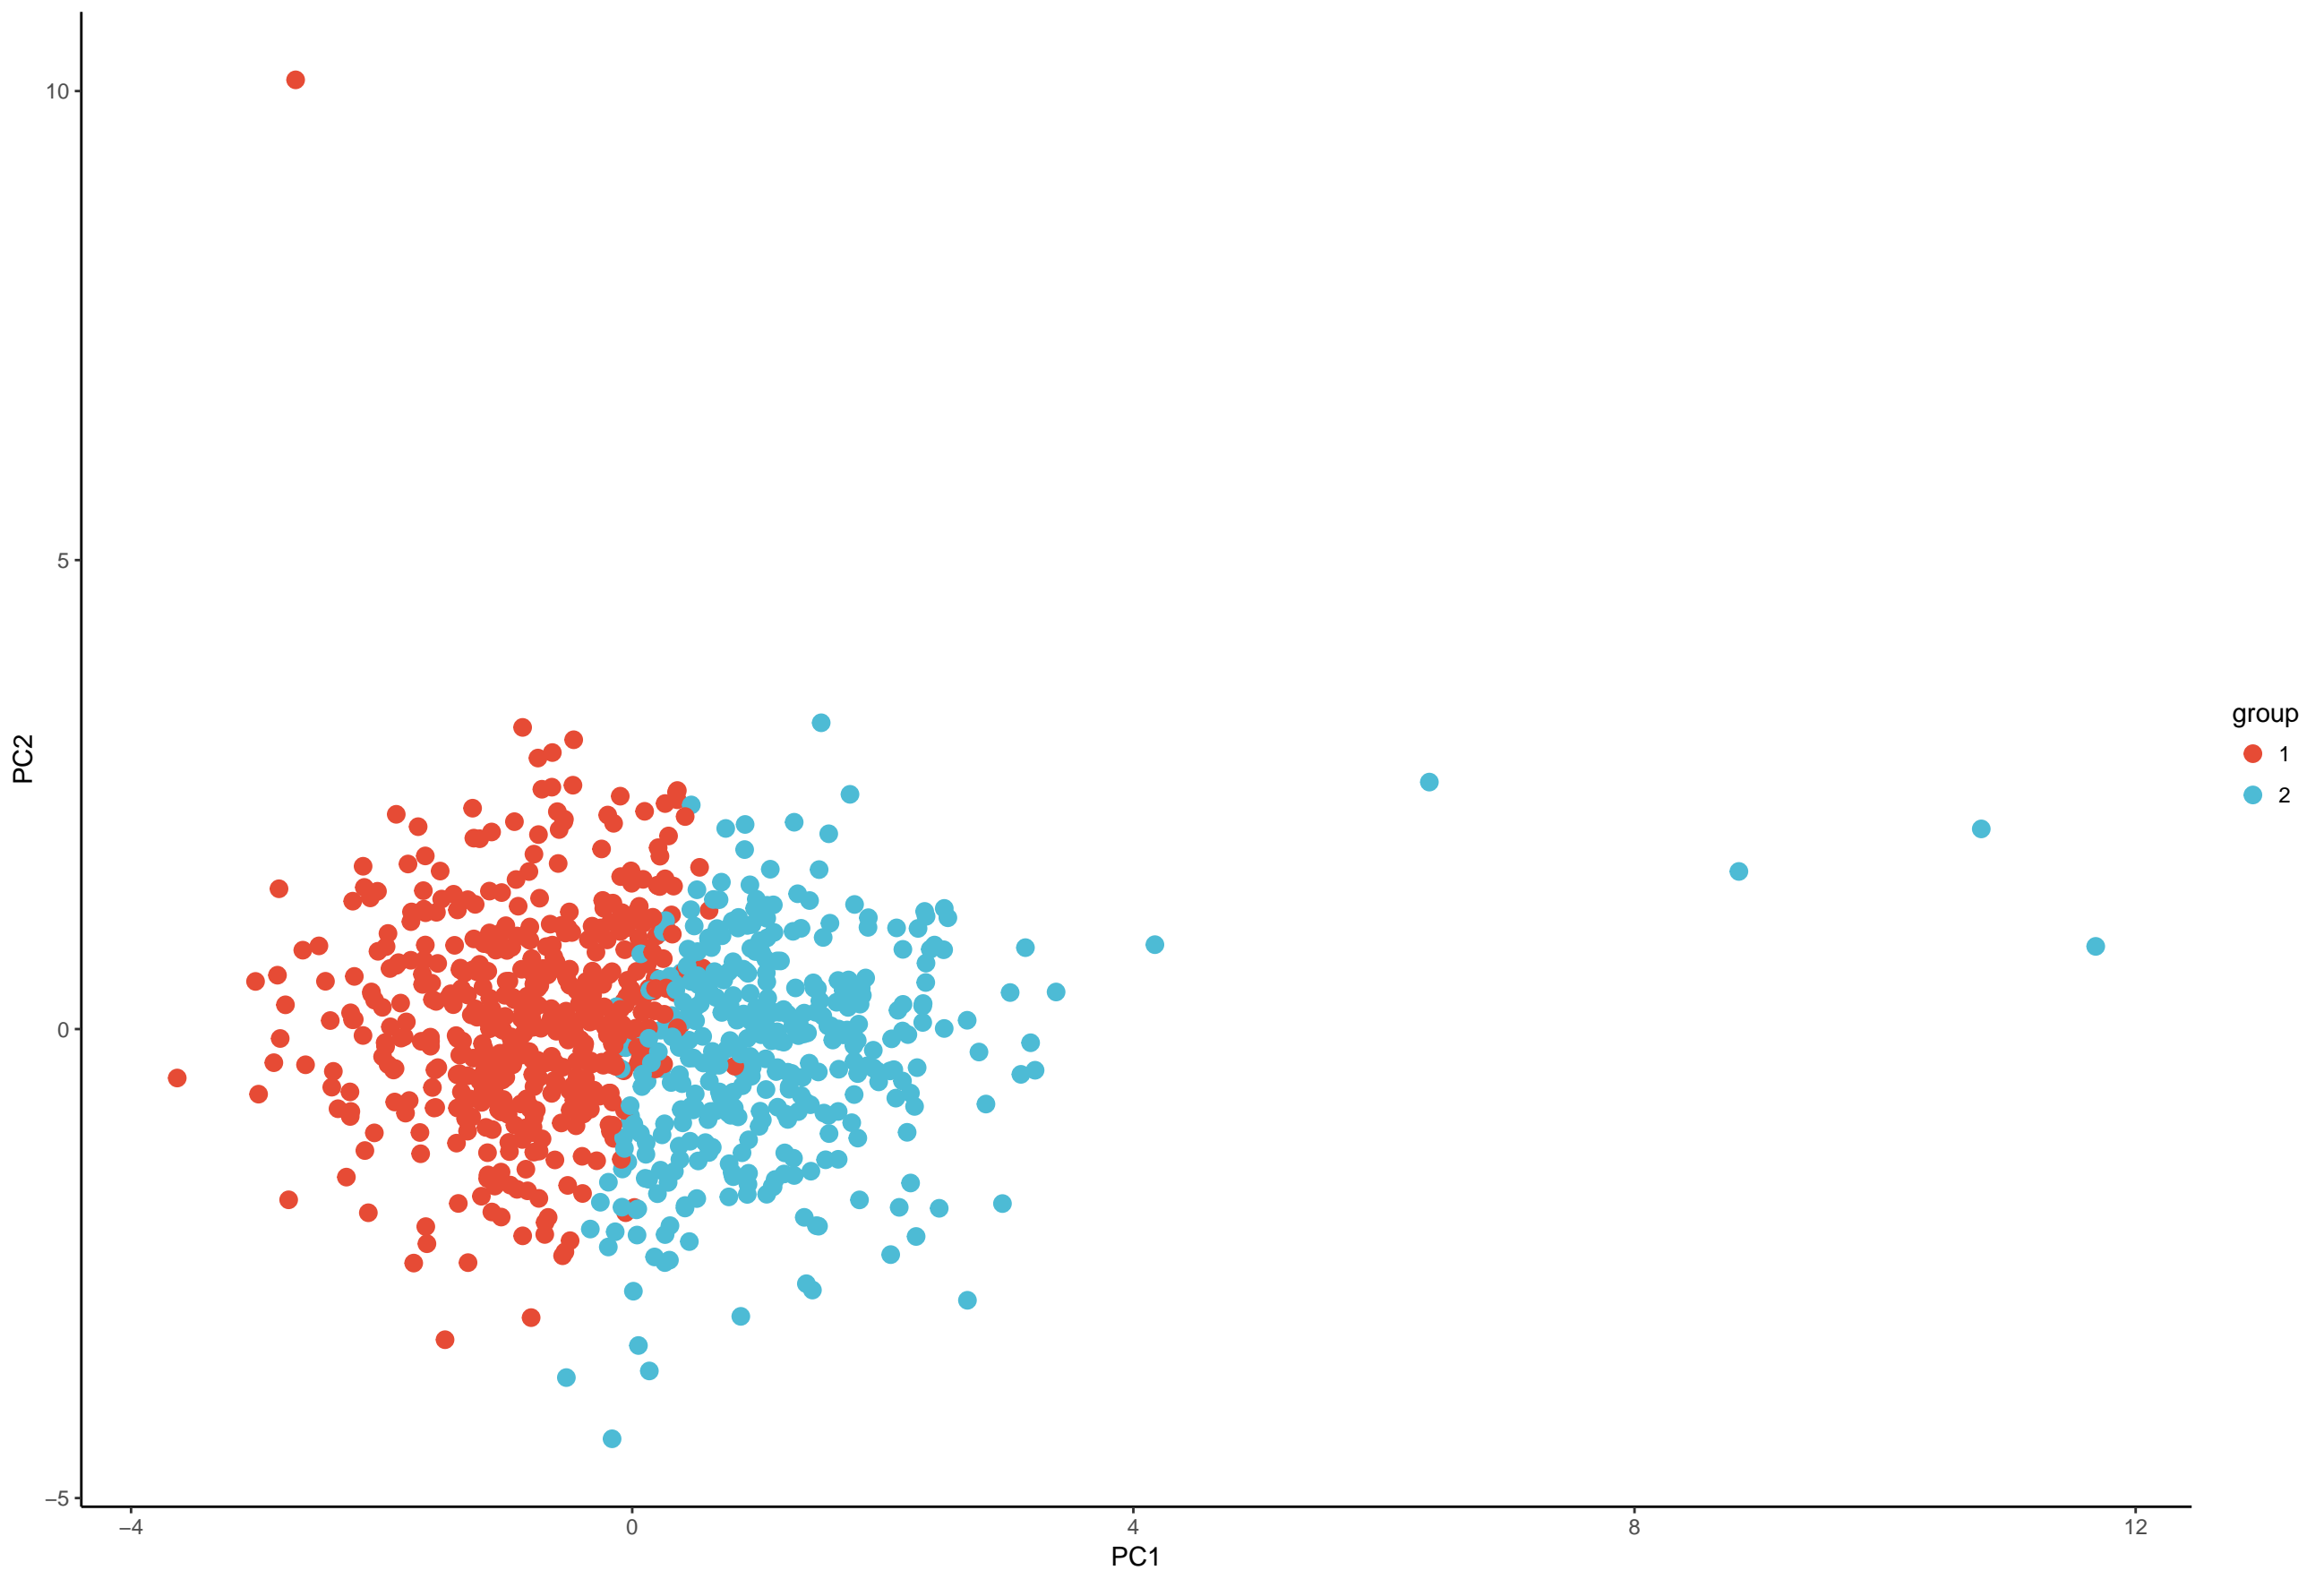



### Group 1

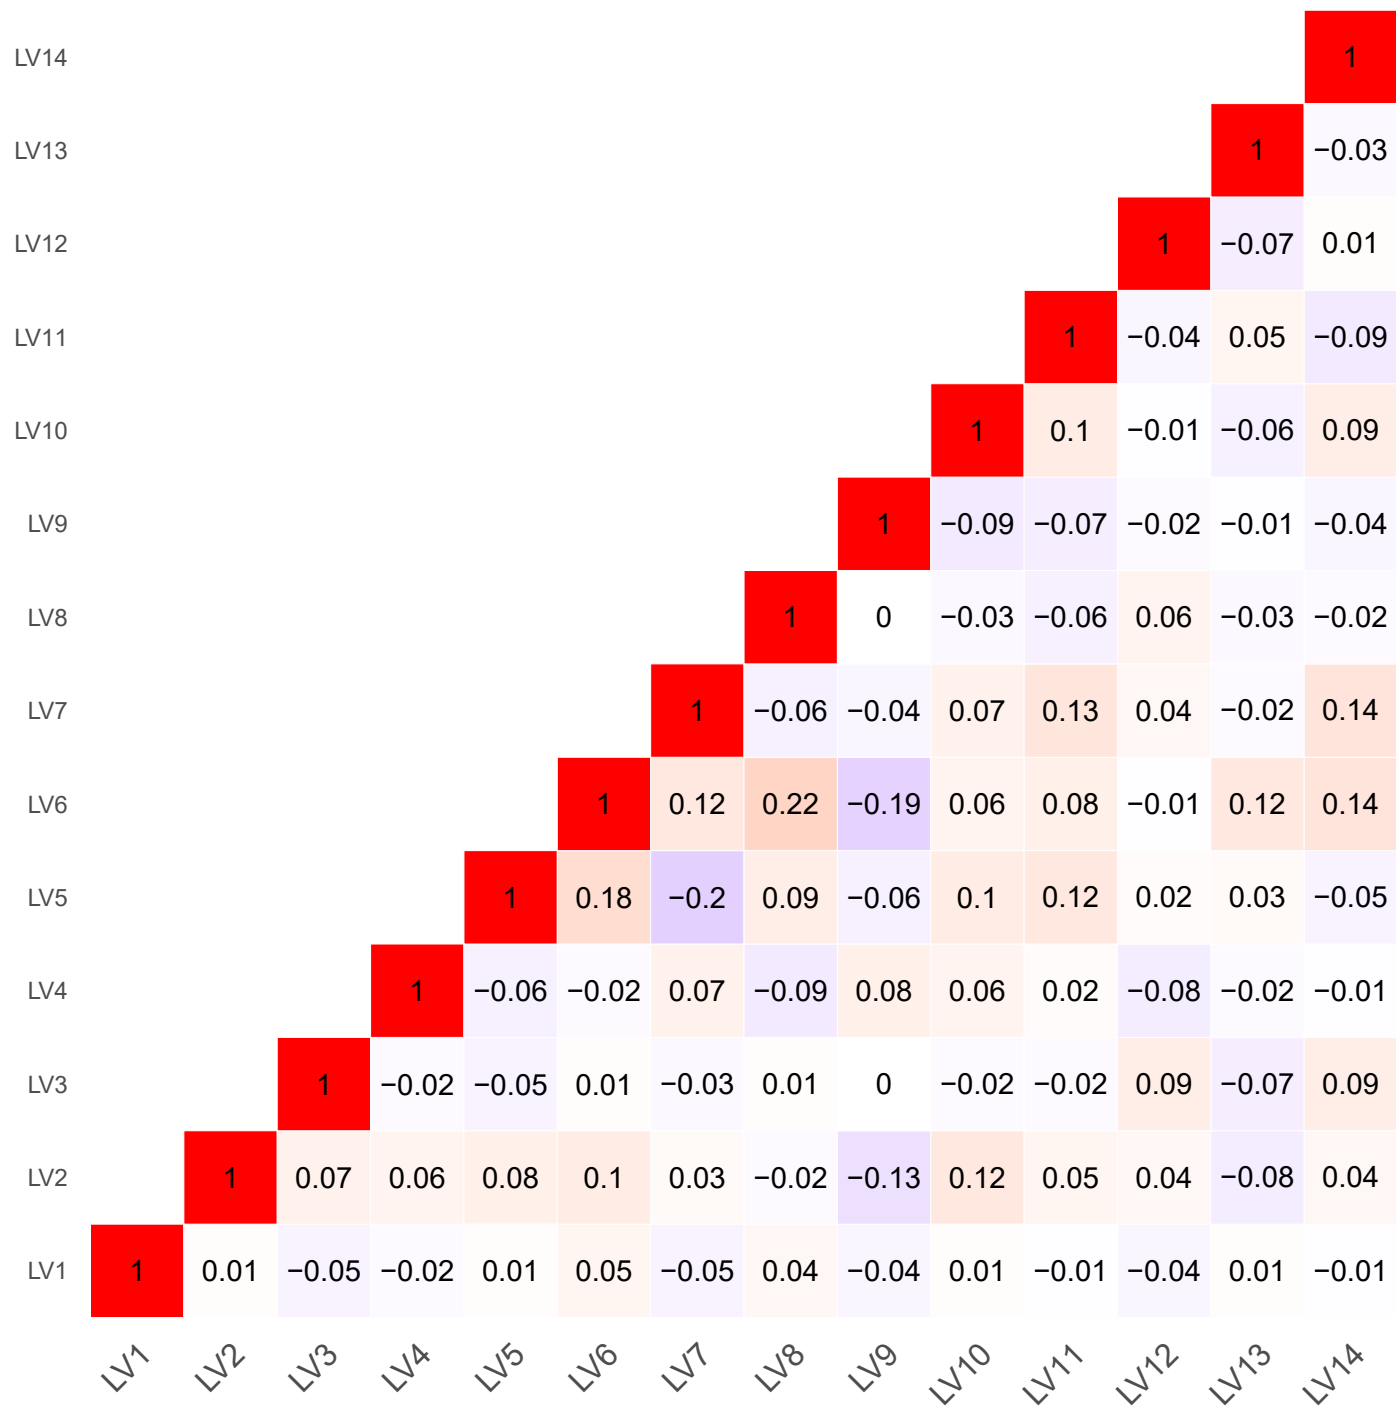

### Group 2

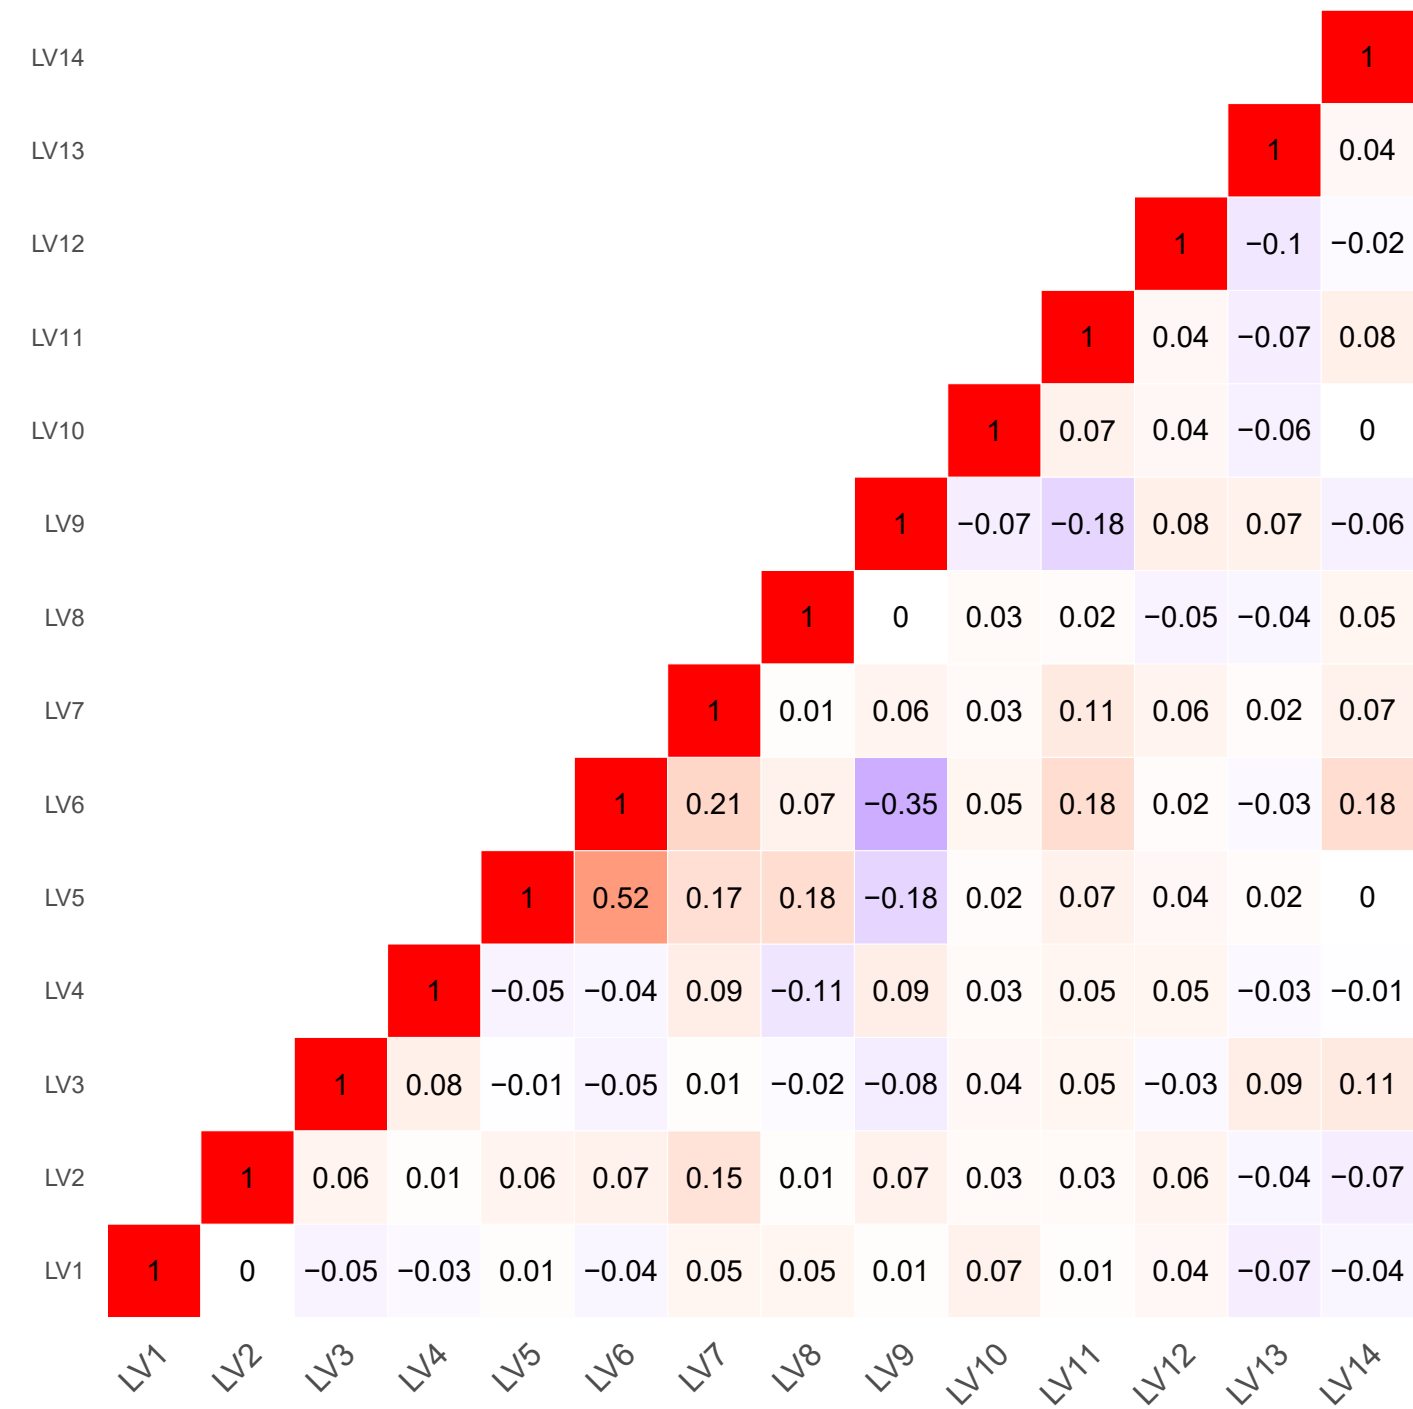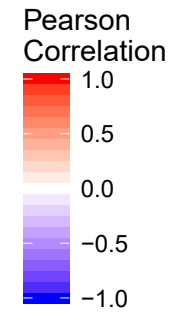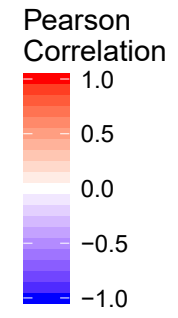

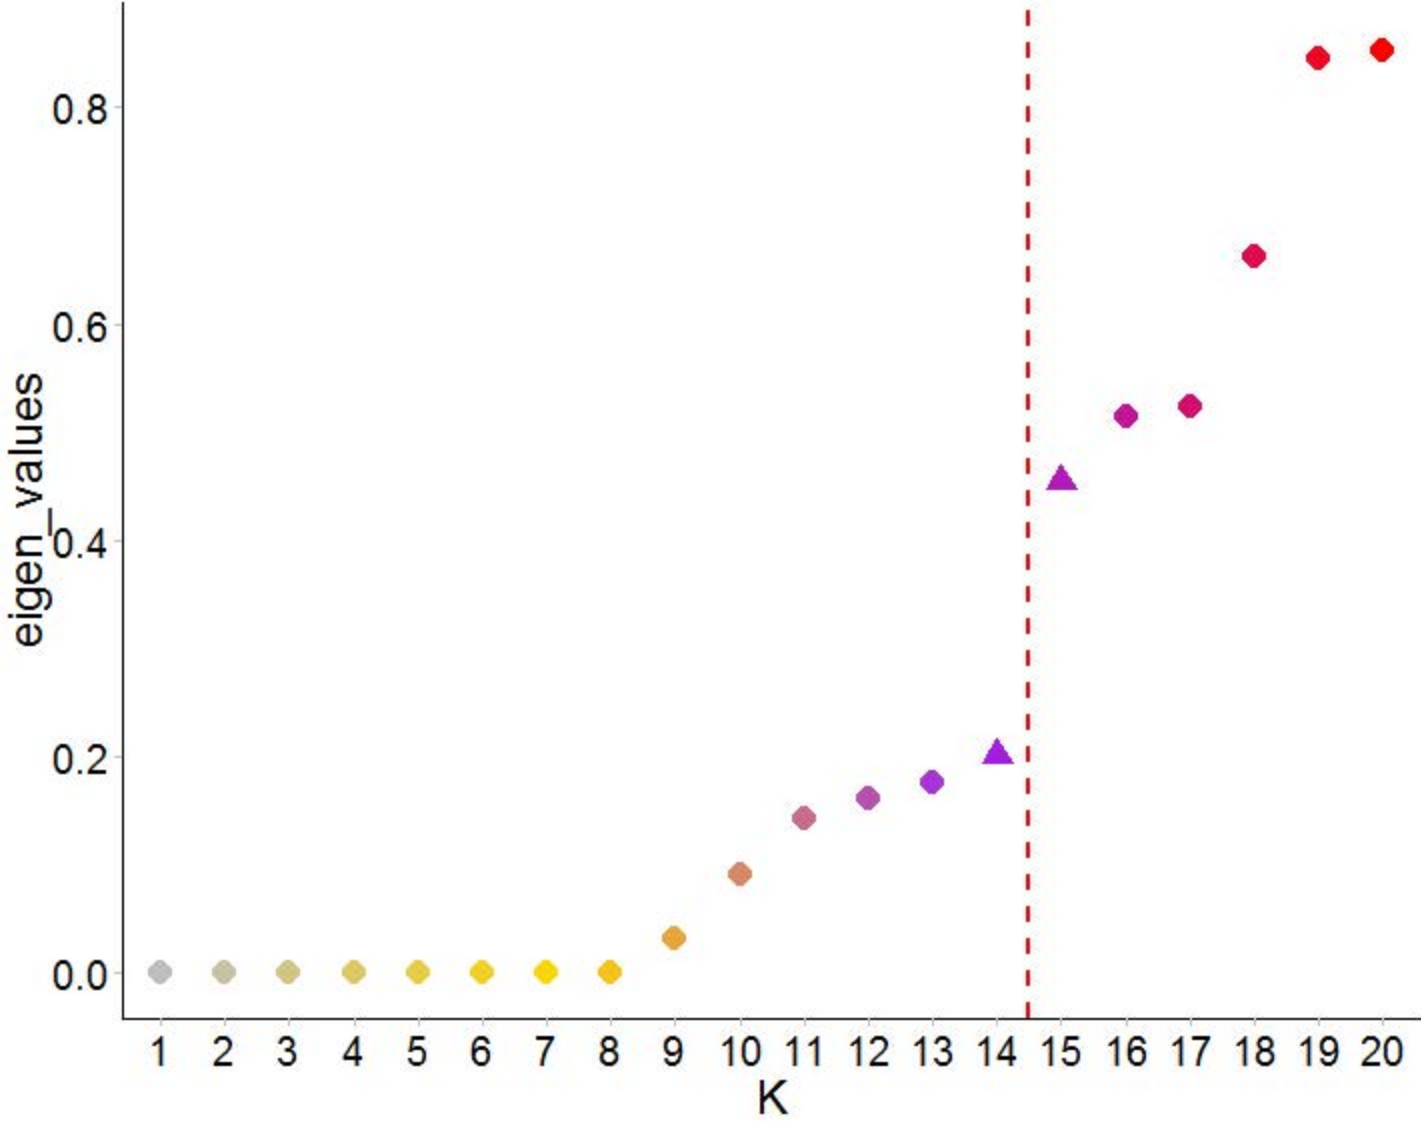

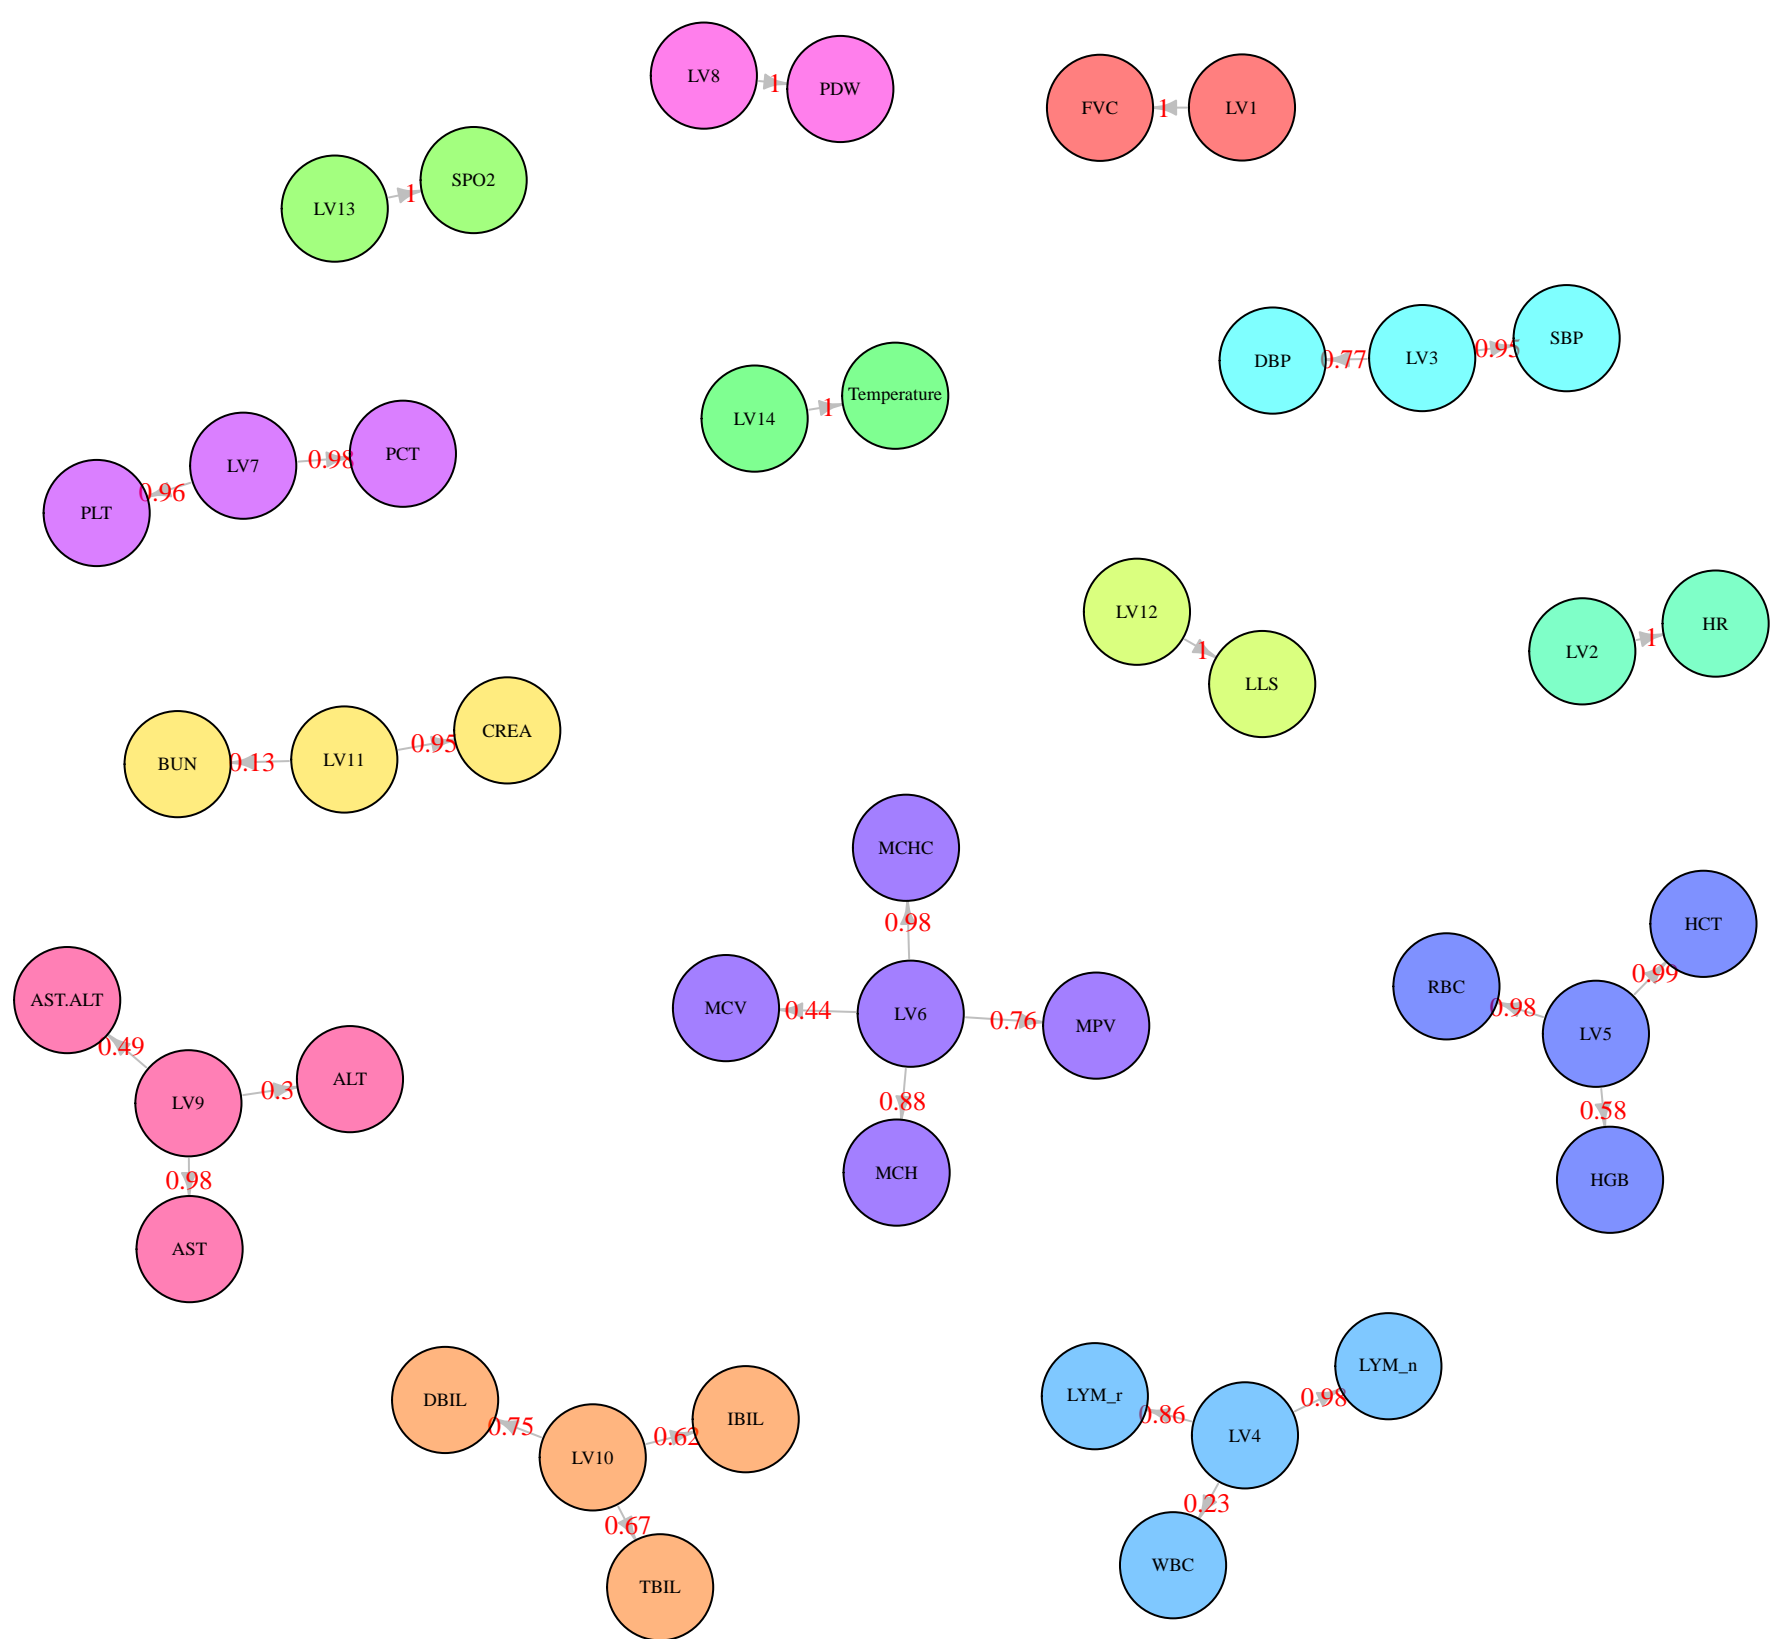

Optimal number of clusters –  $k = 2$

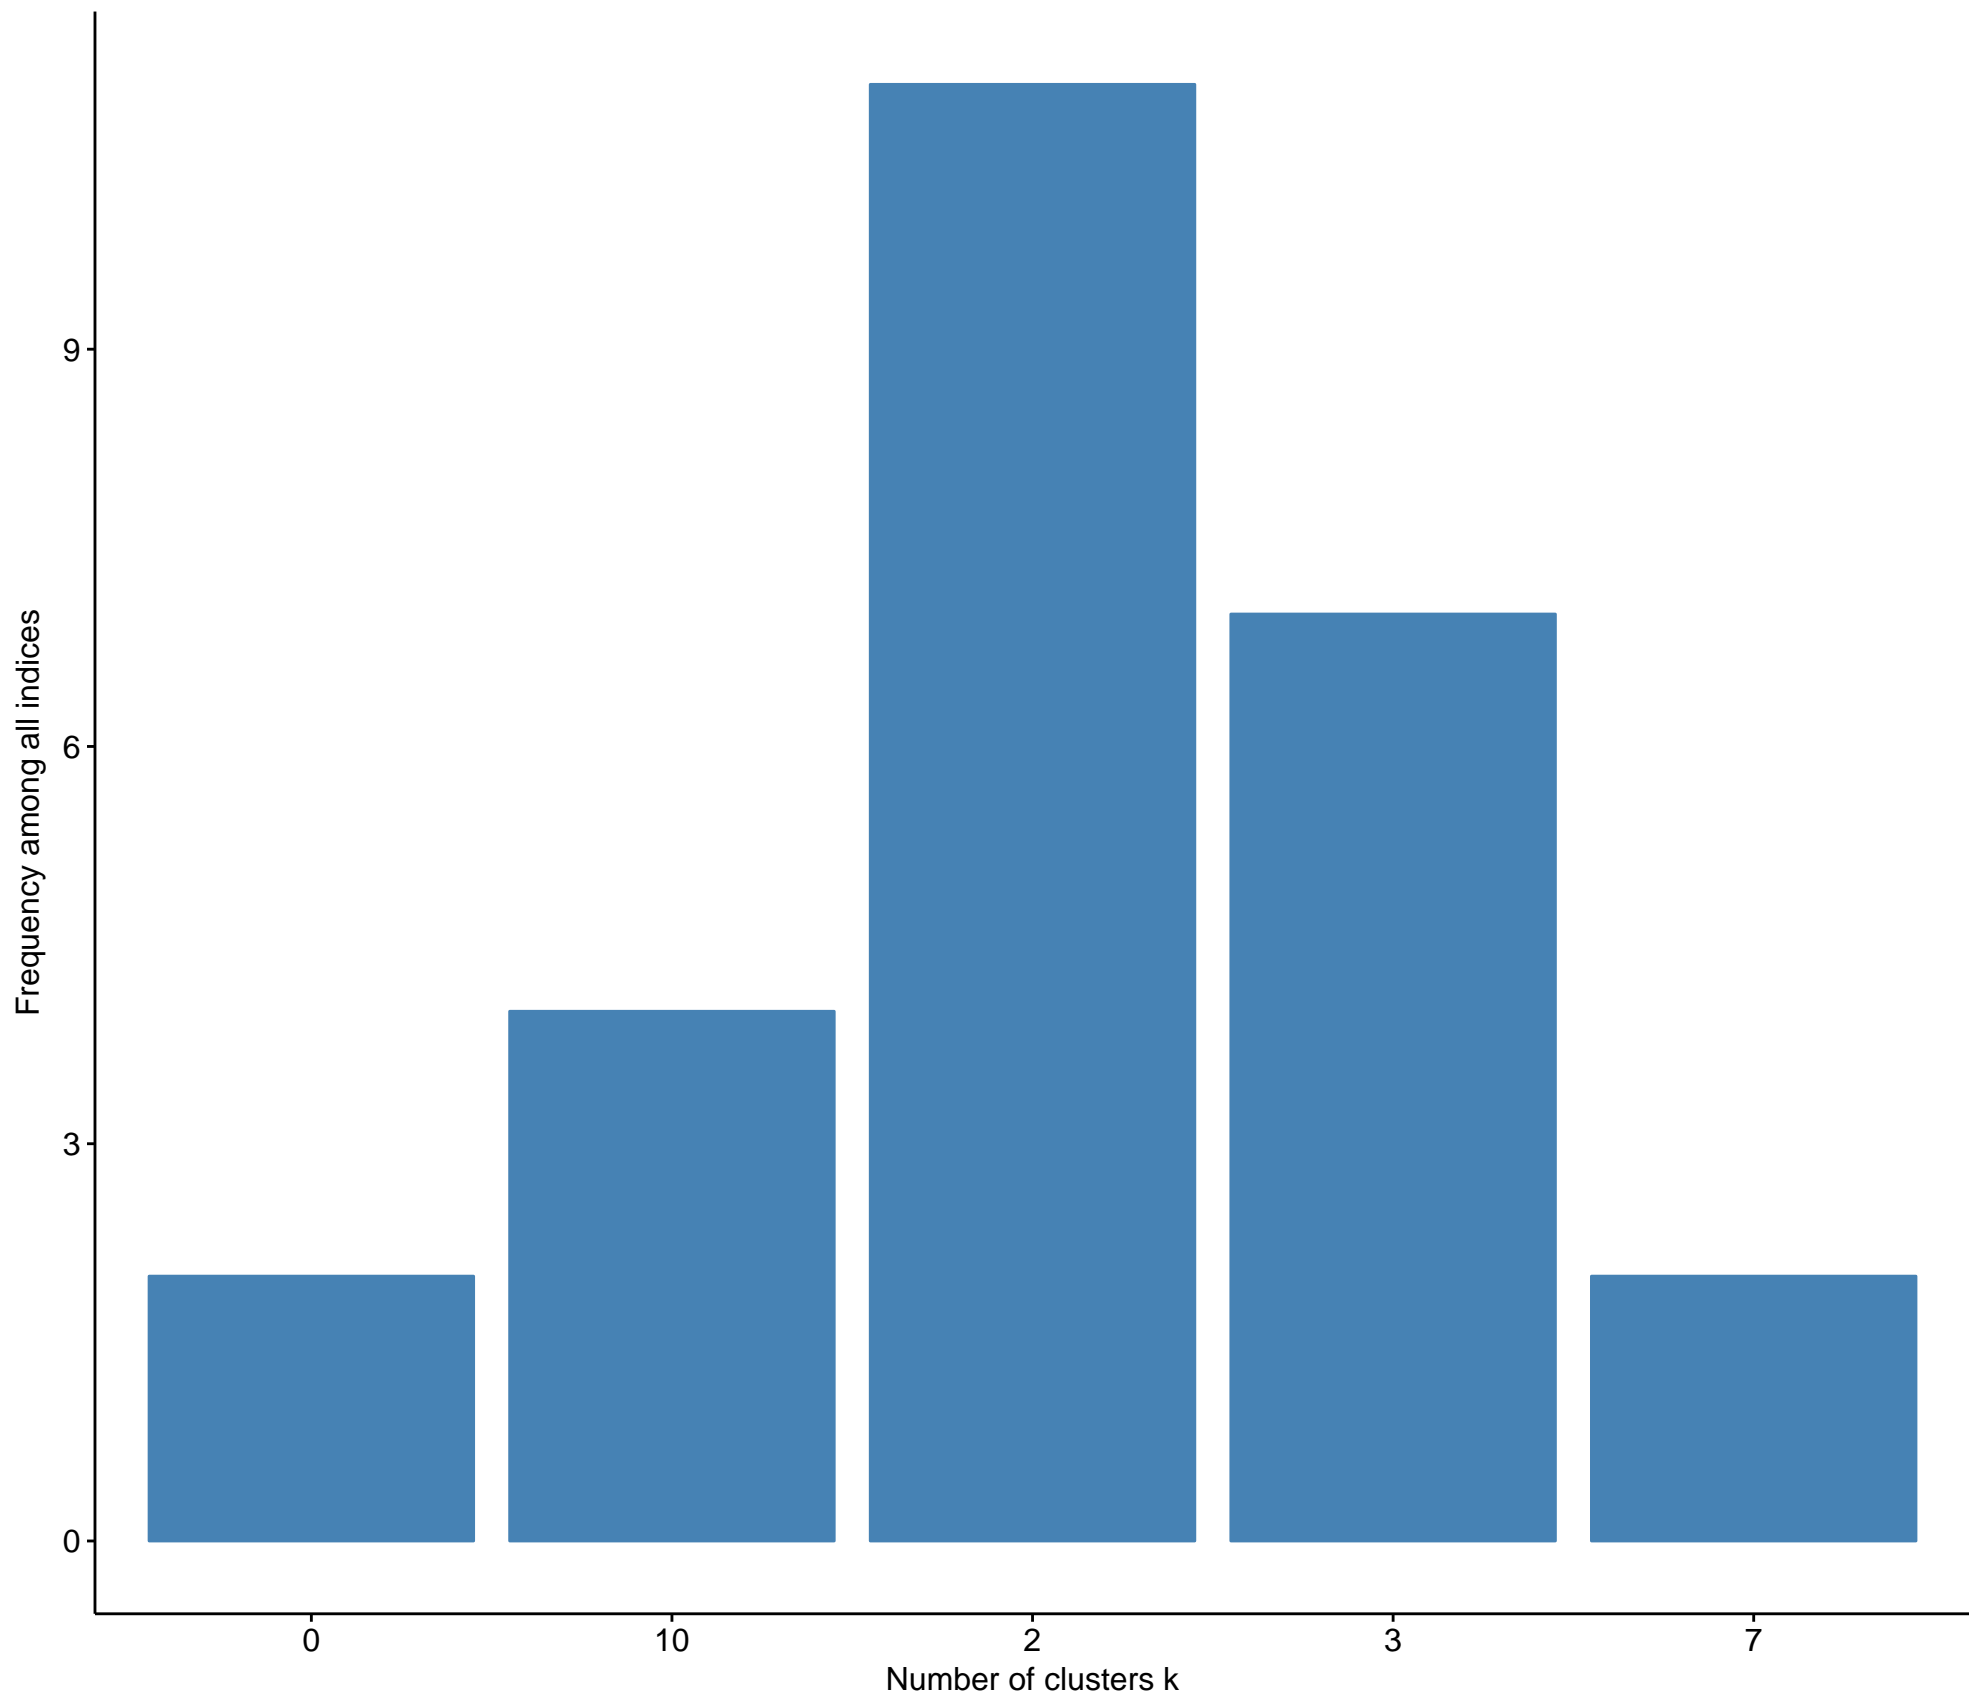

Clusters silhouette plot  
Average silhouette width: 0.08

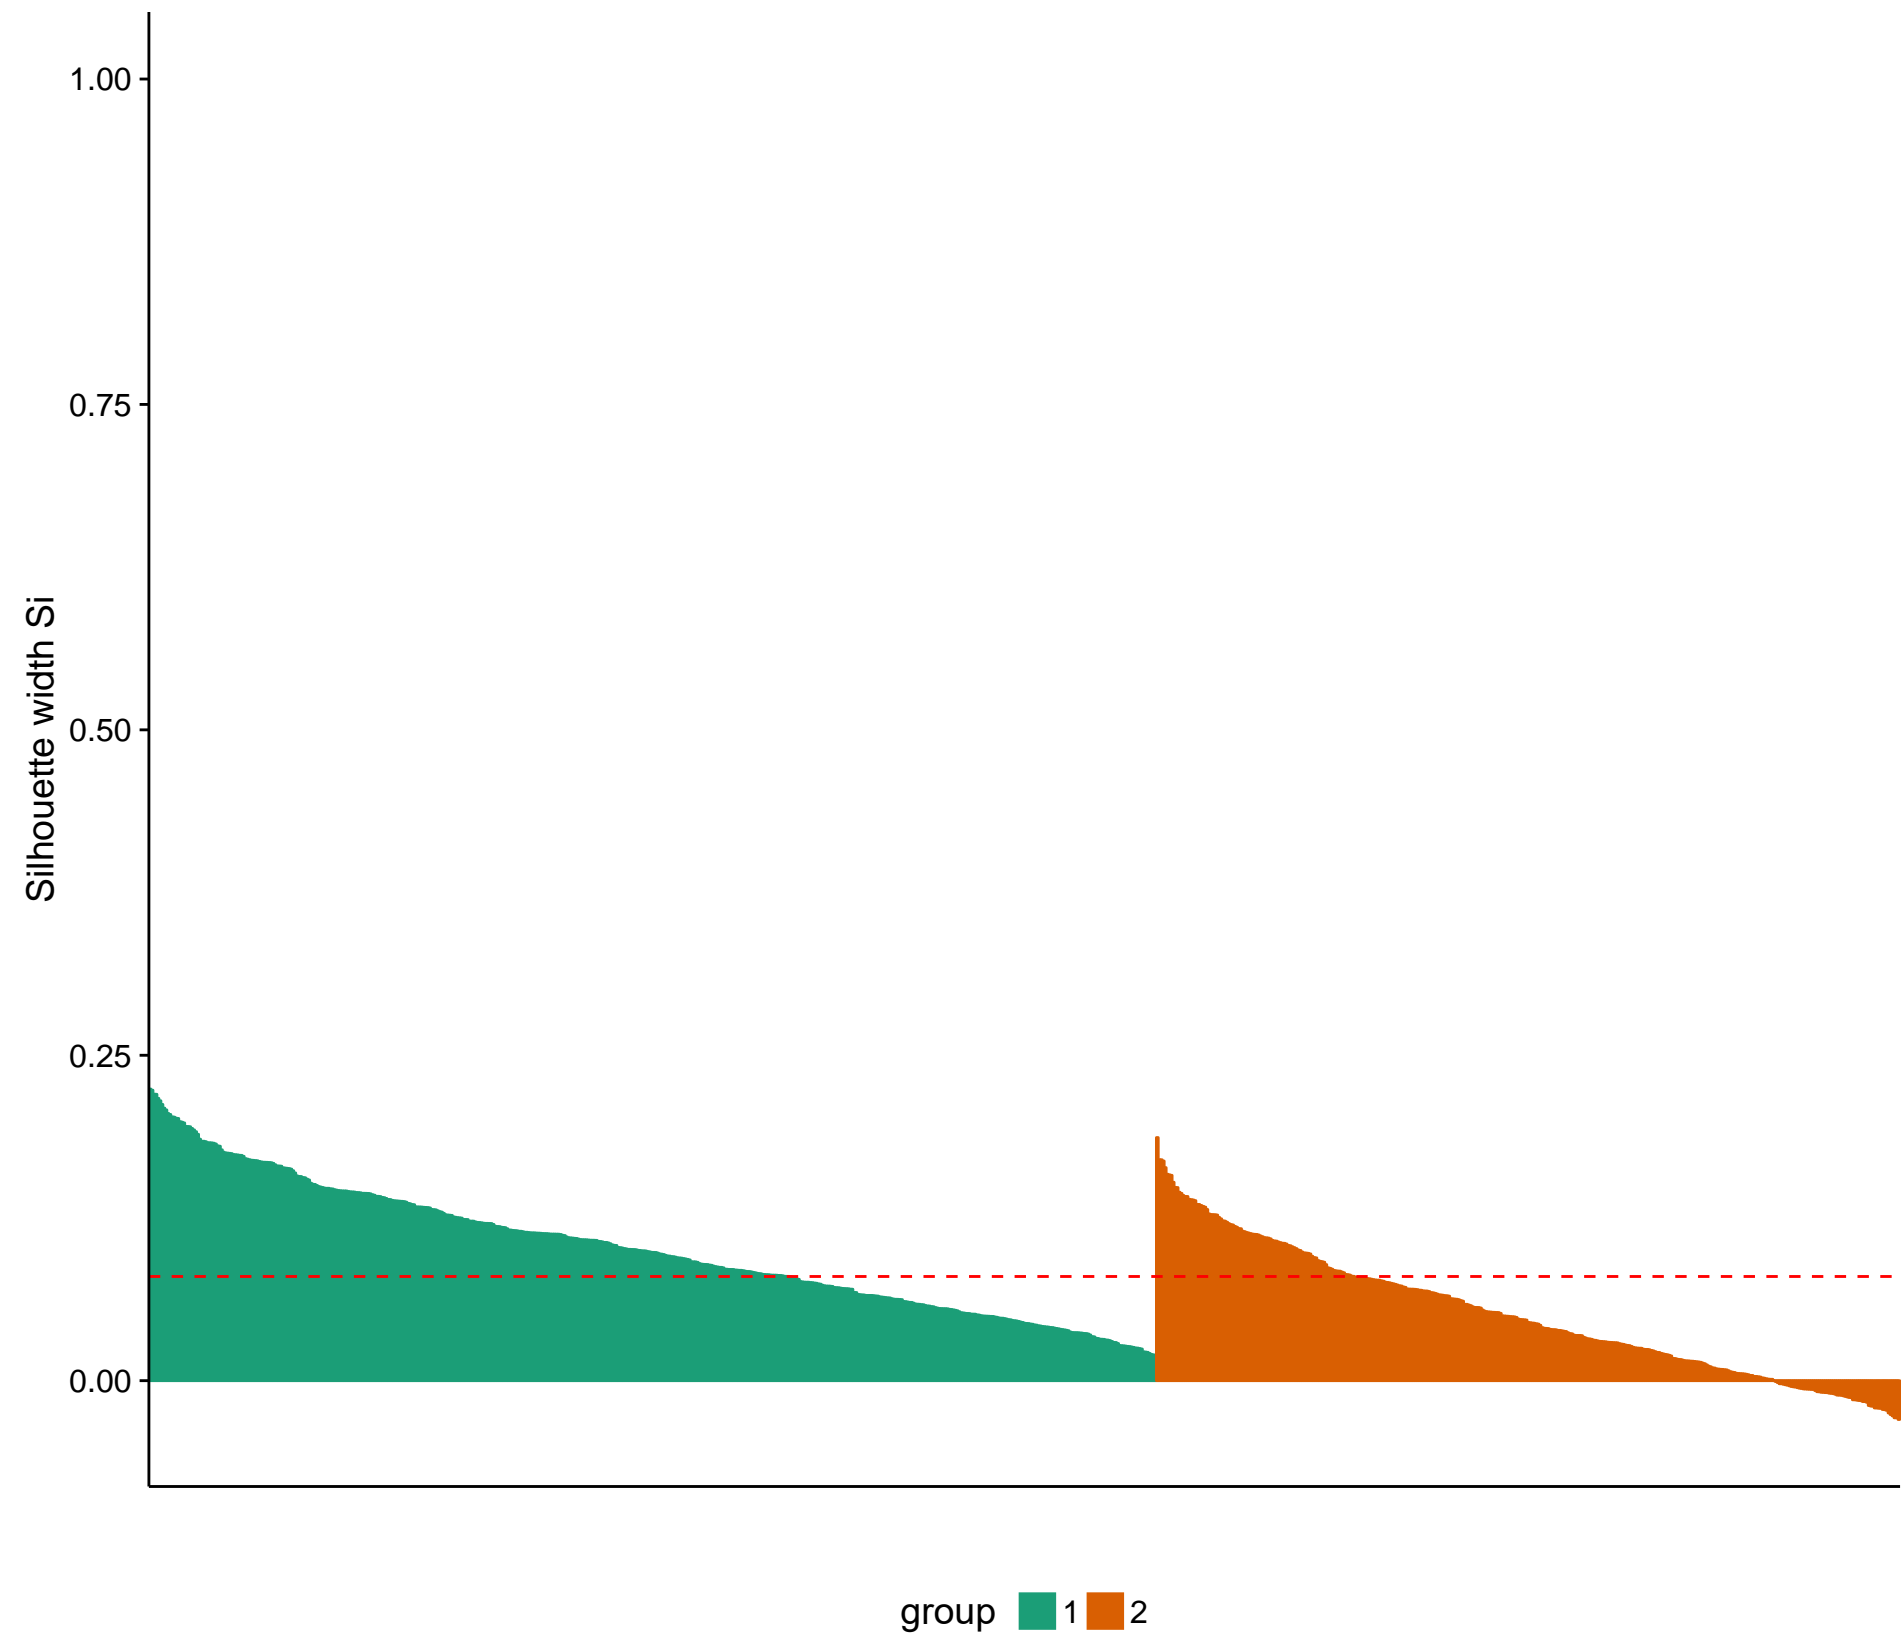

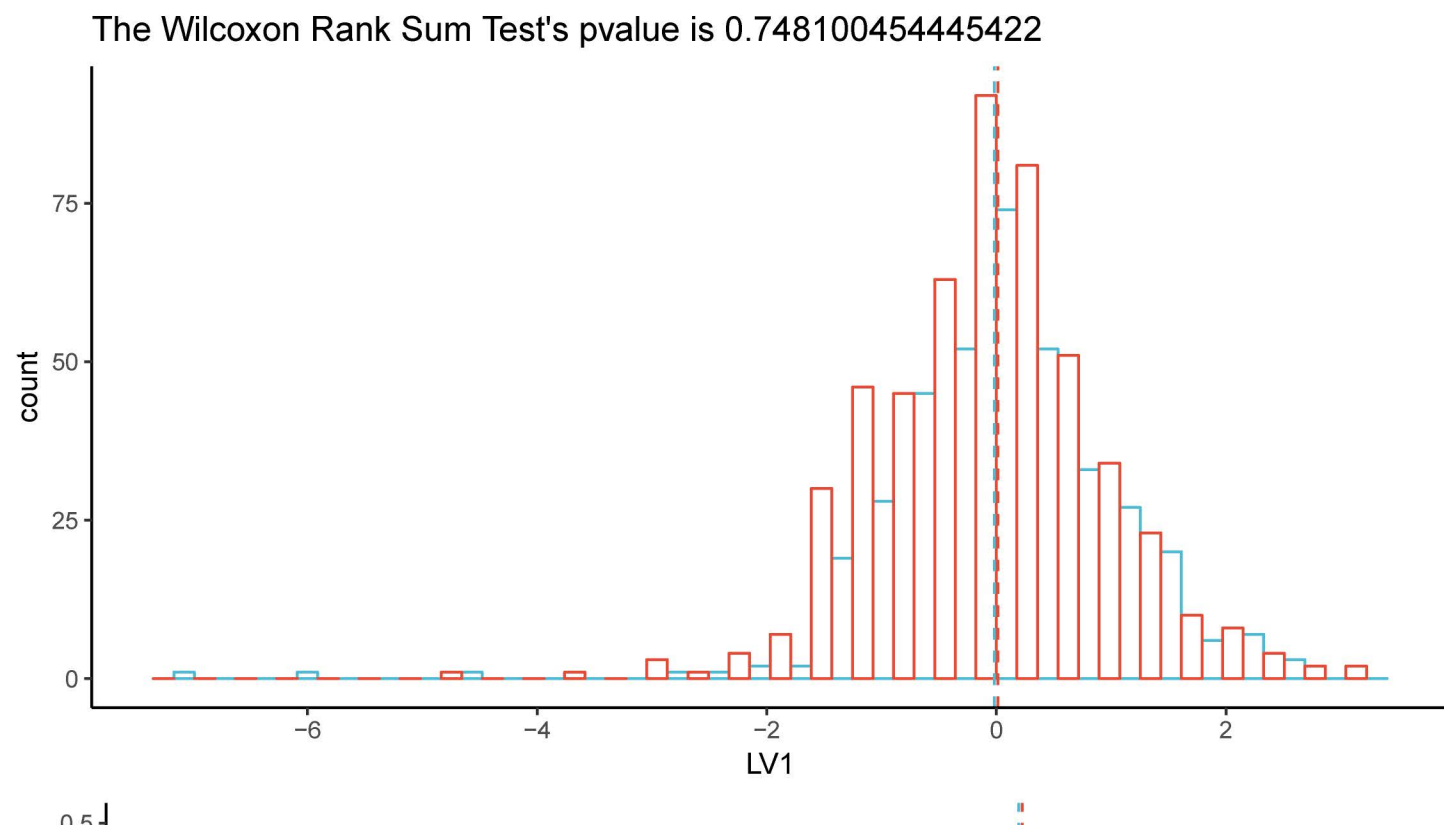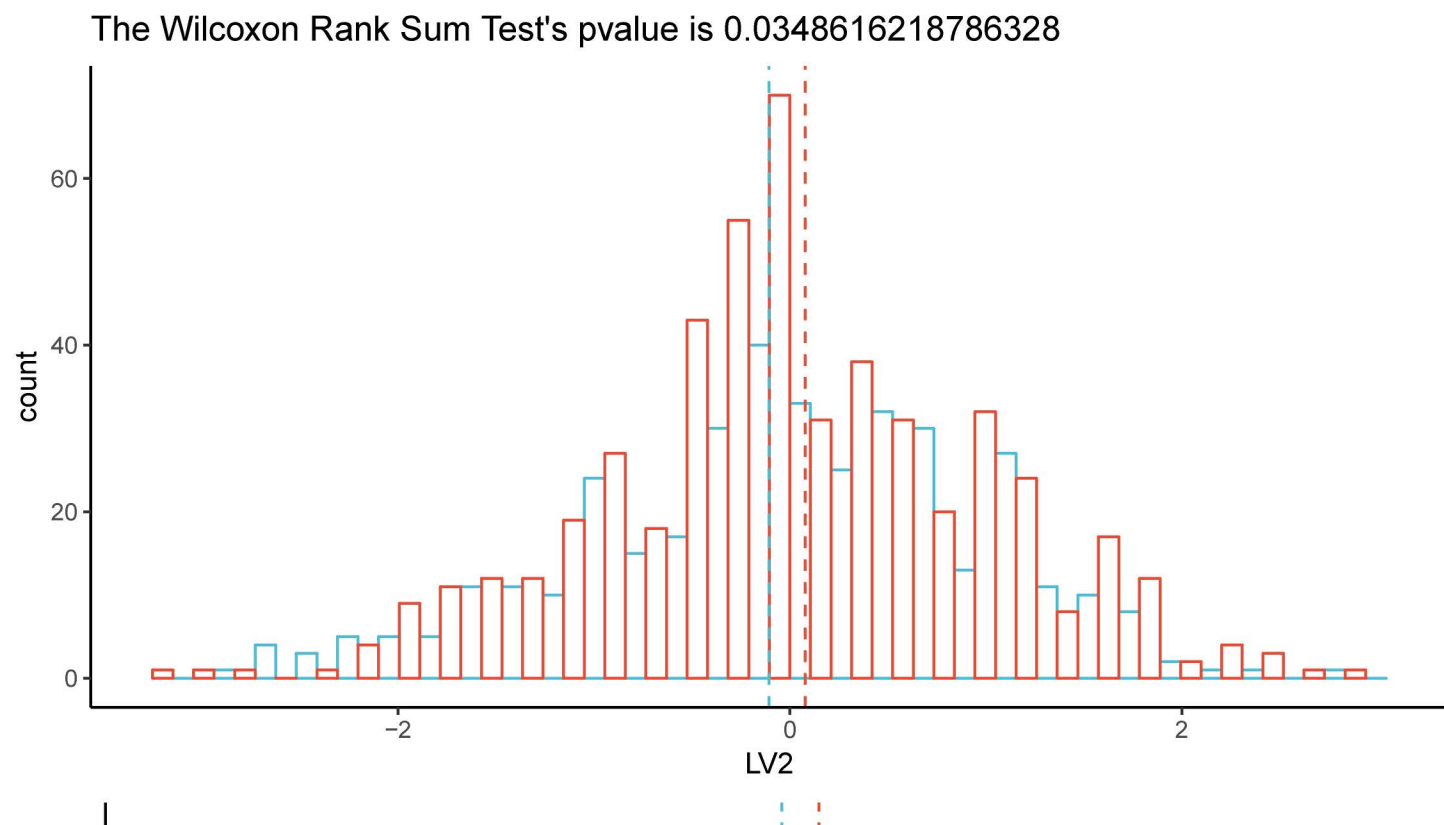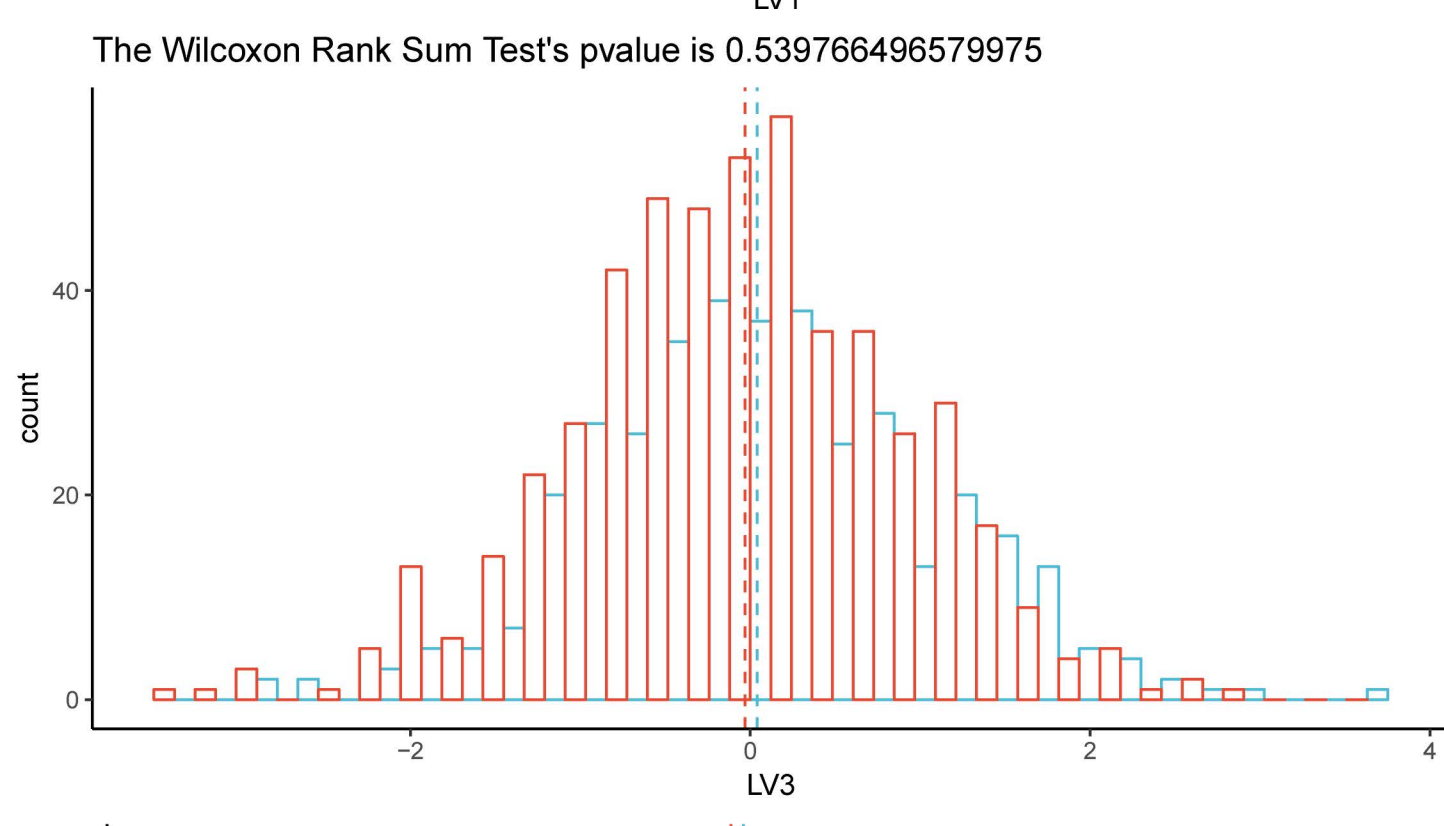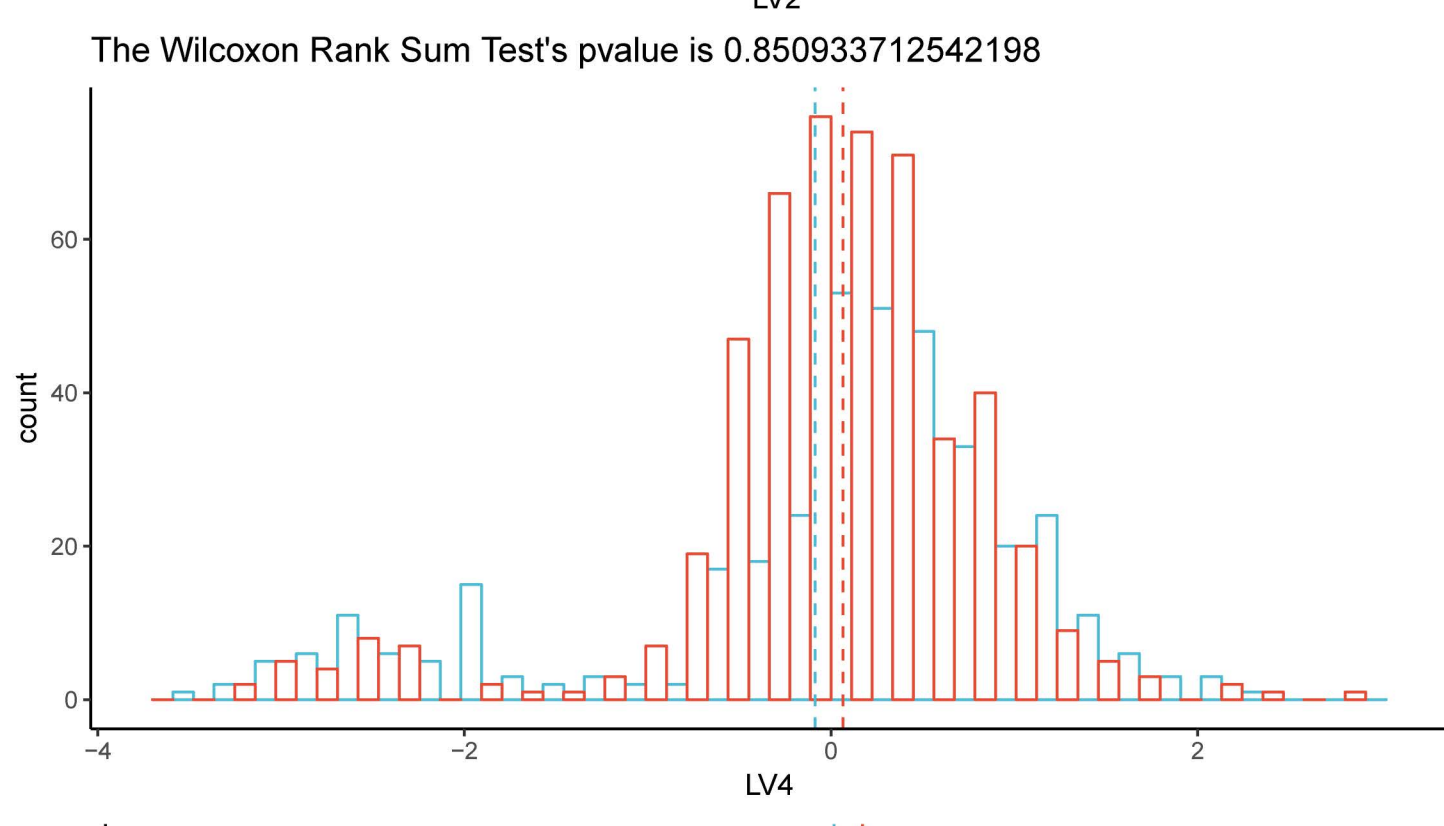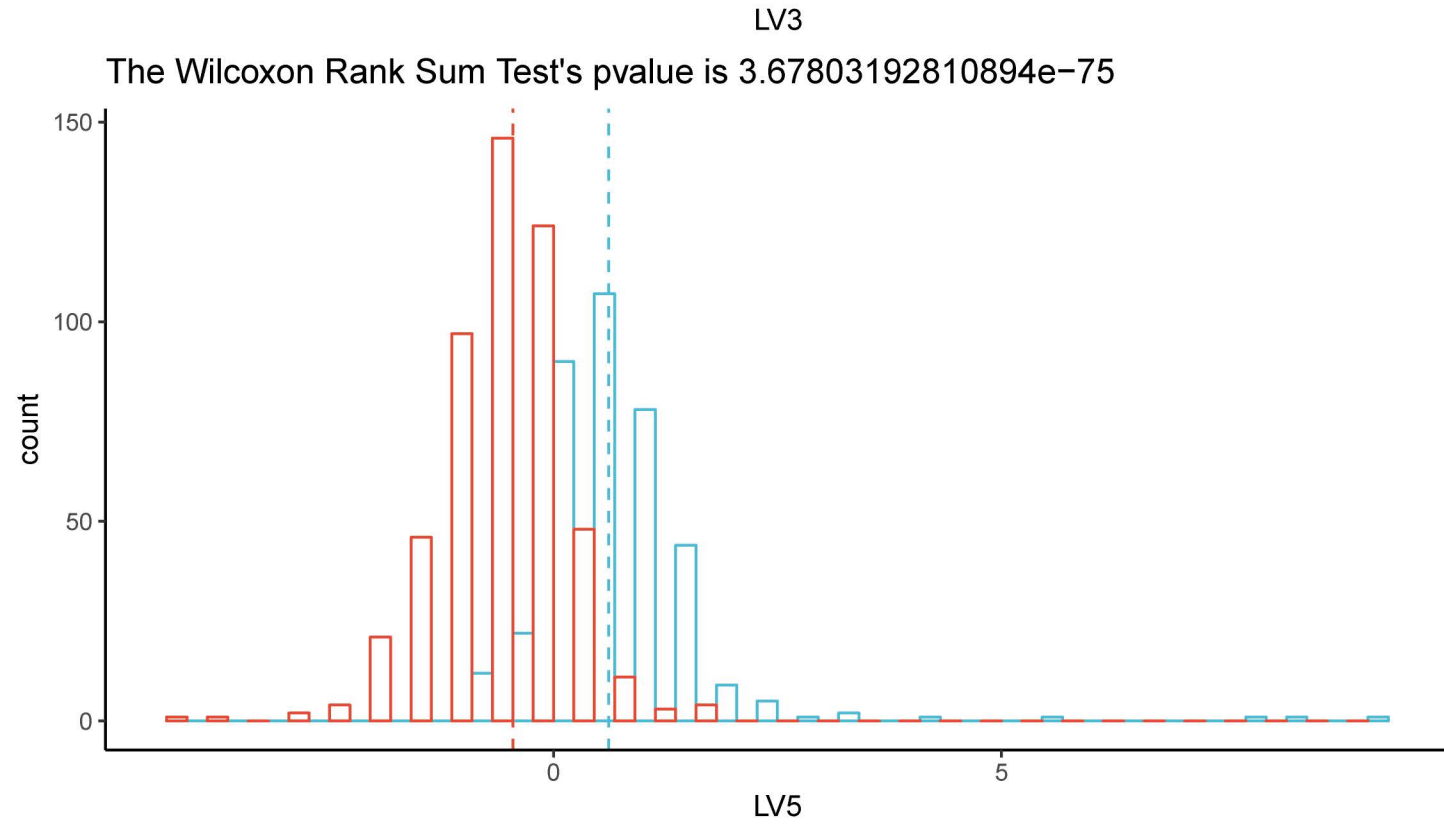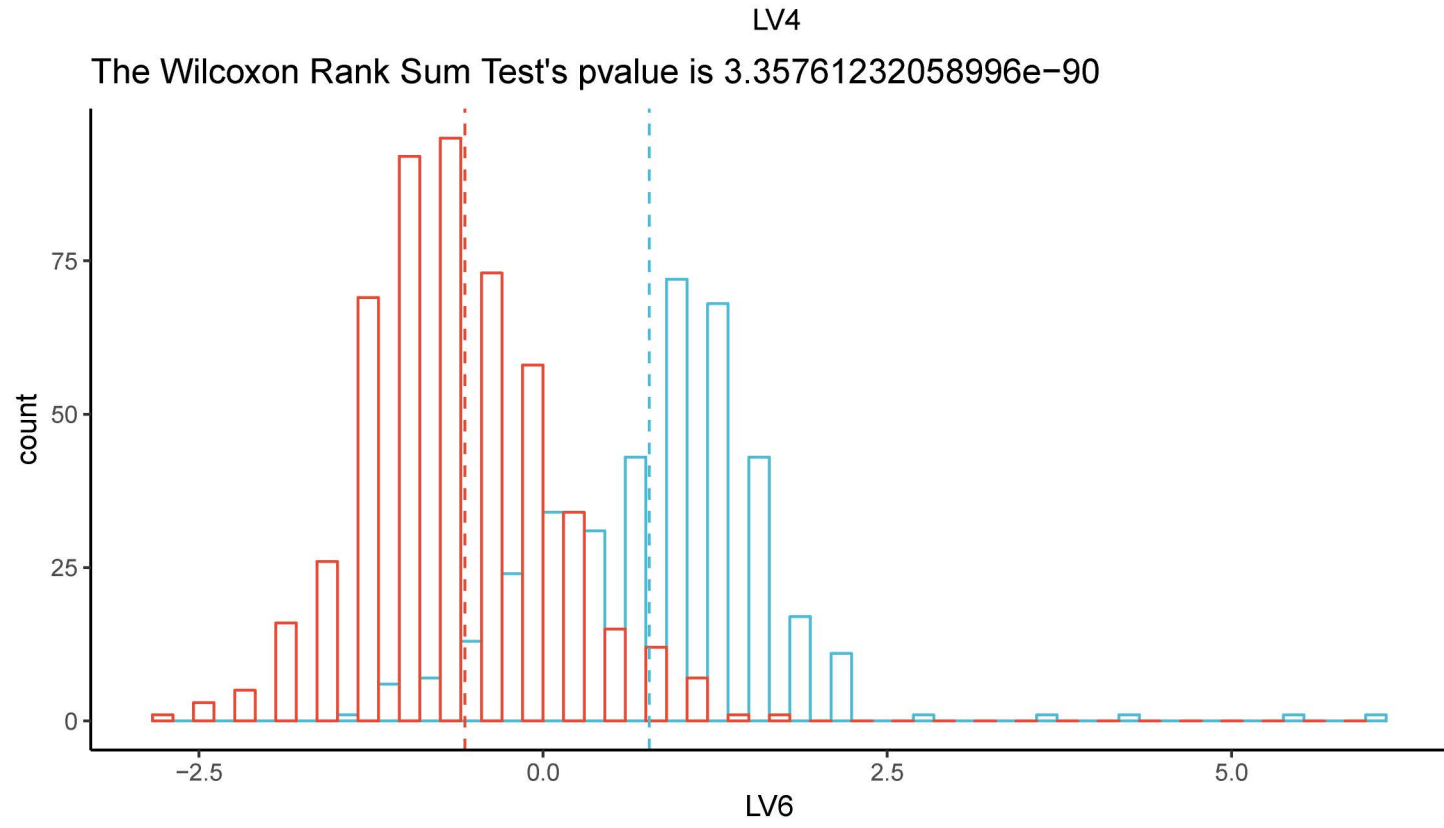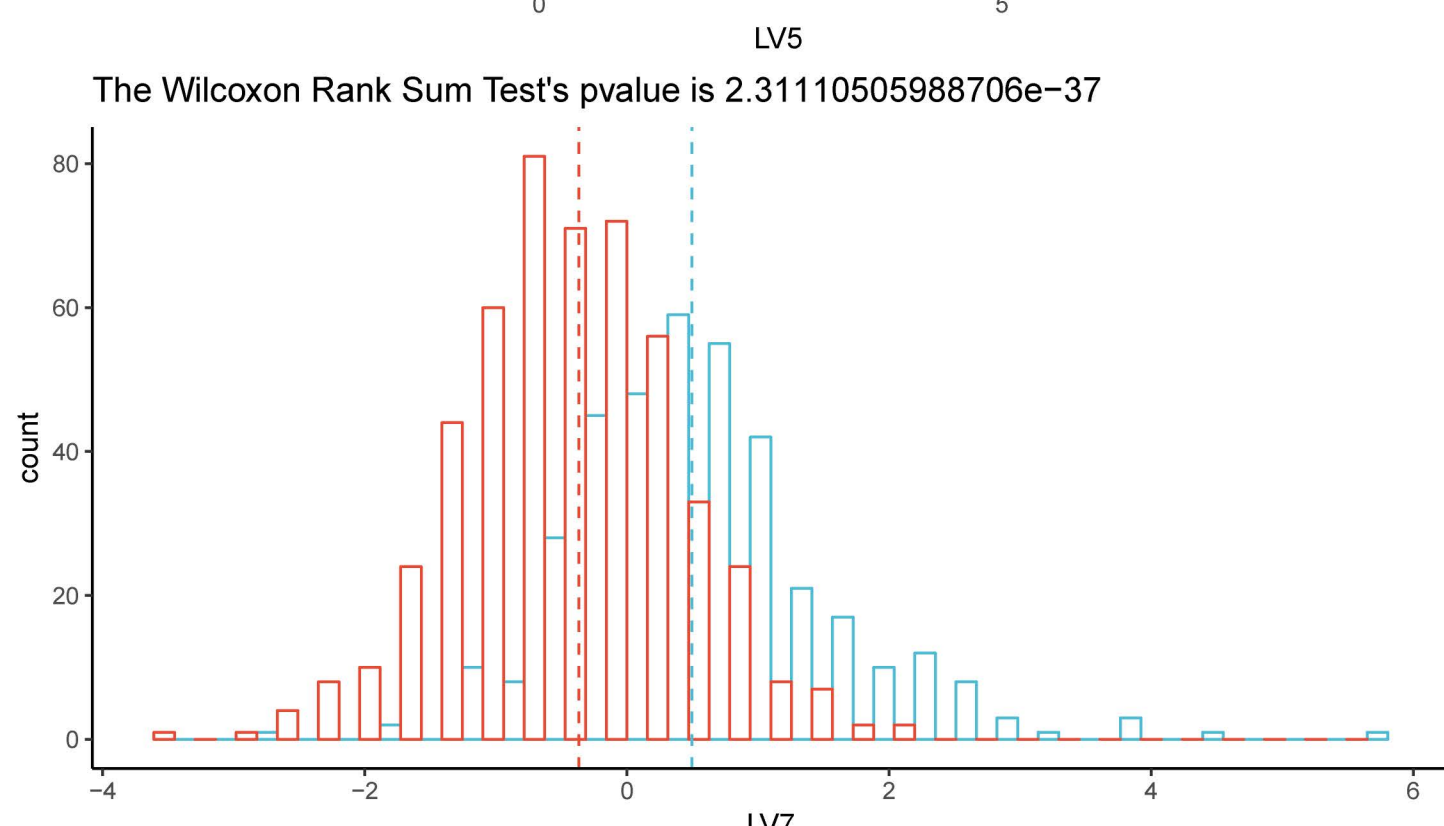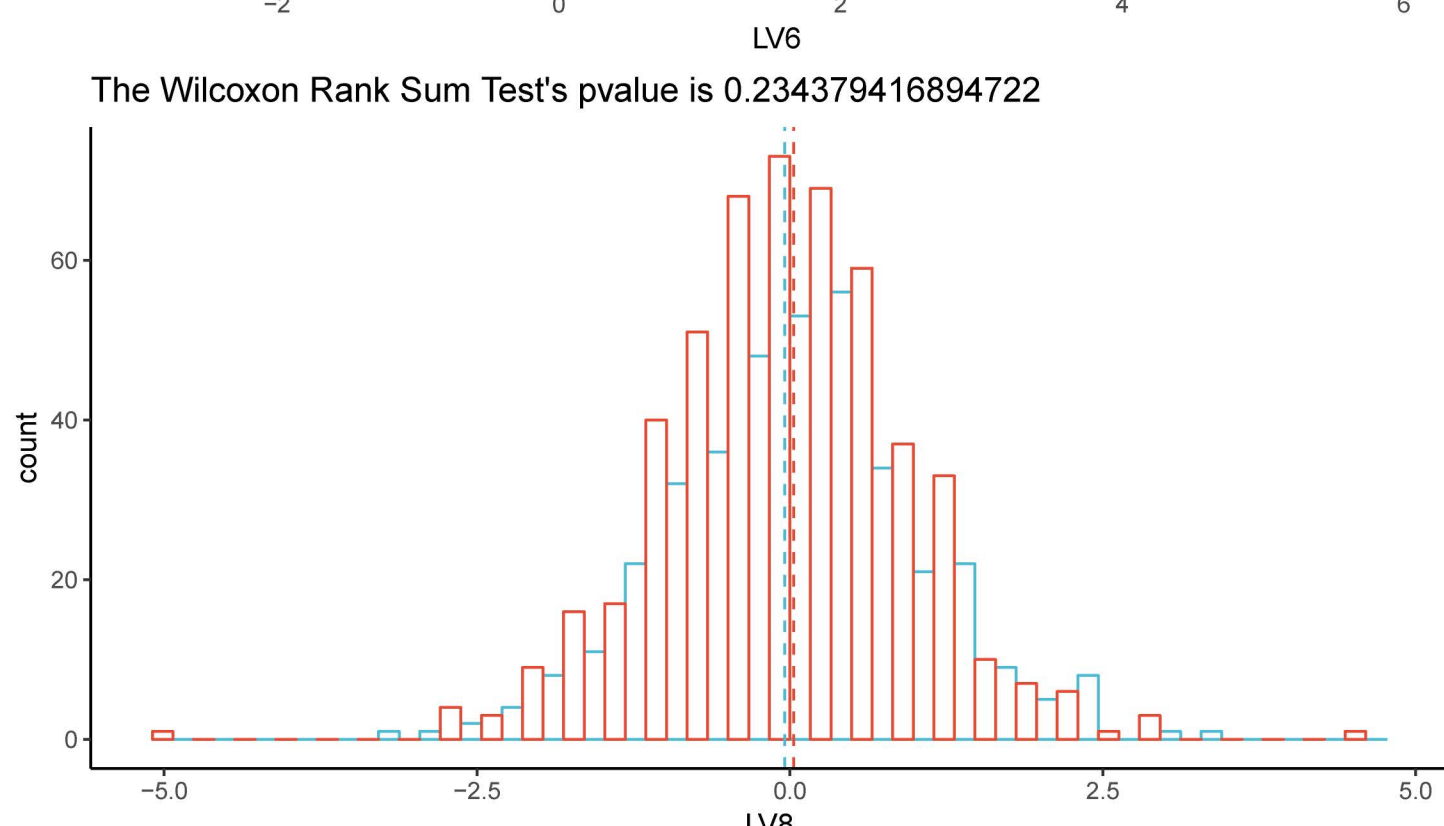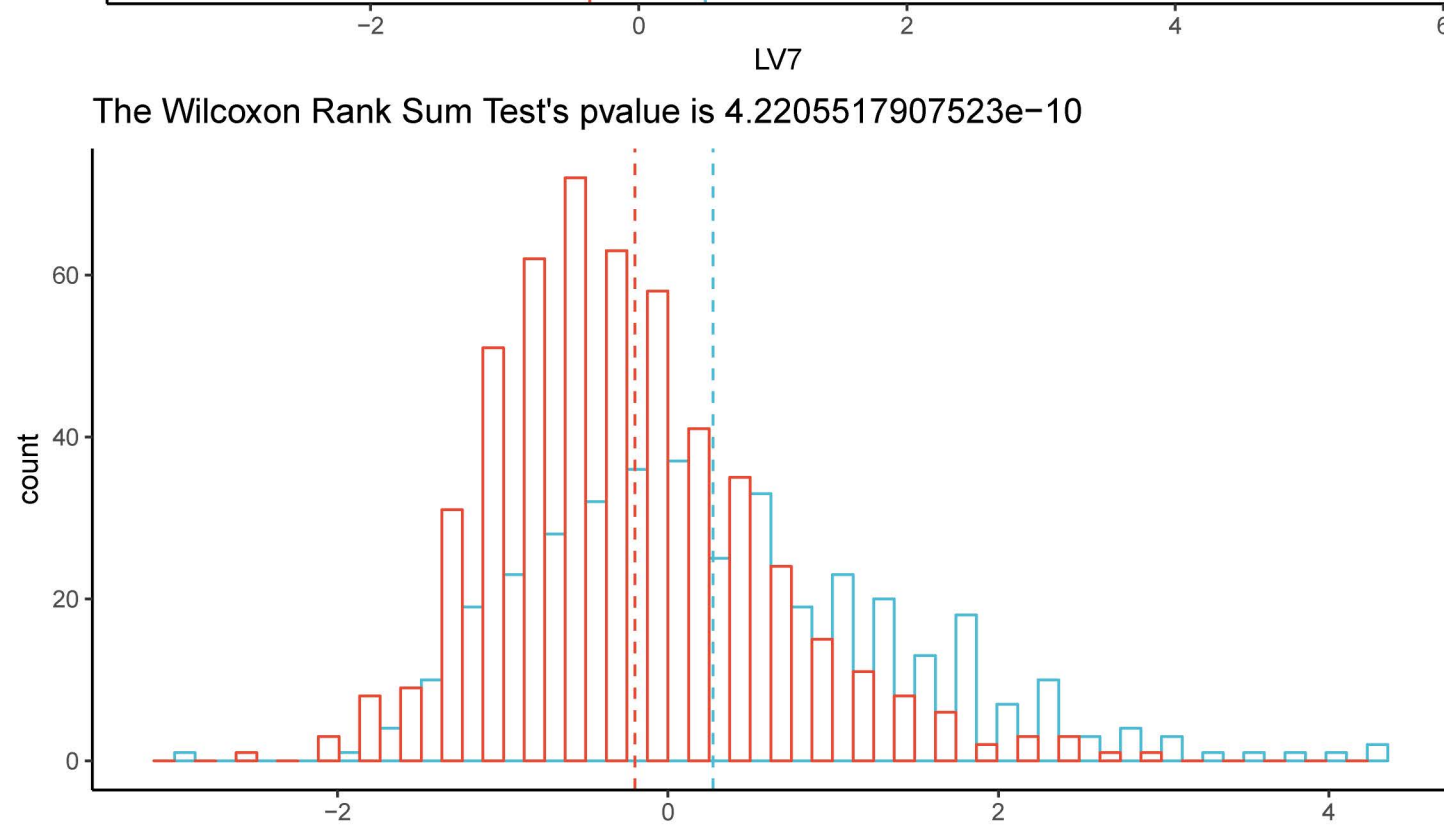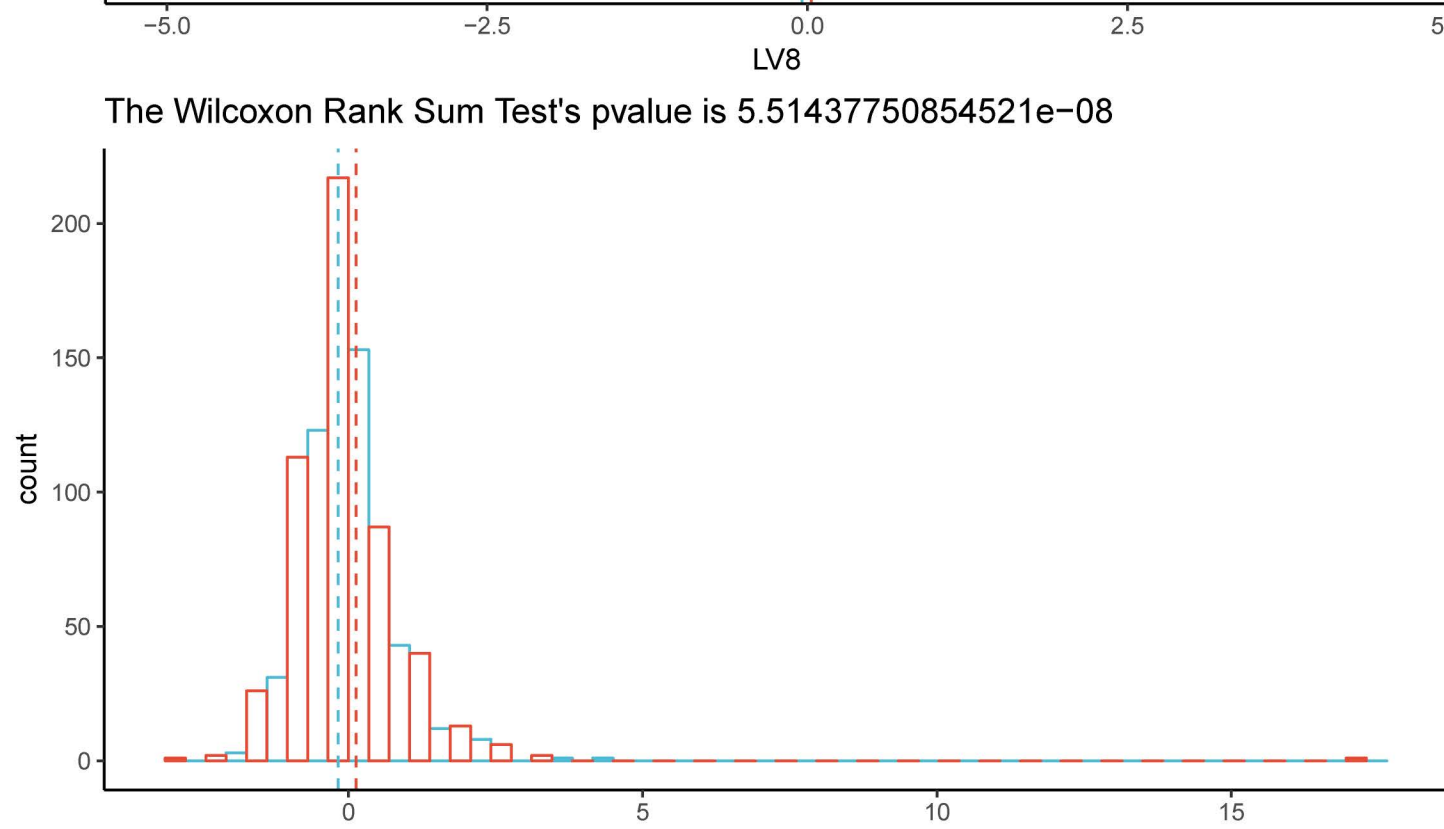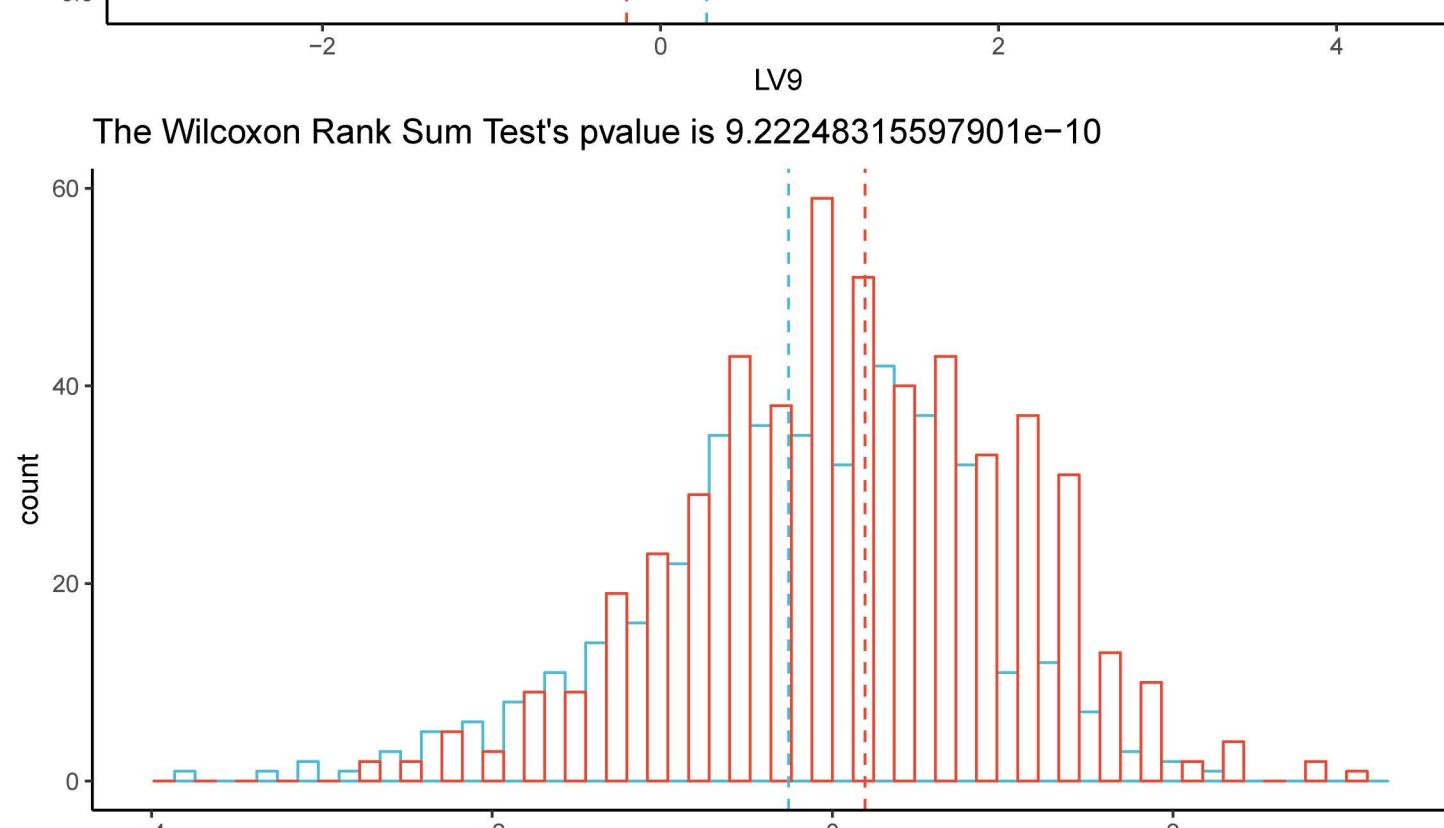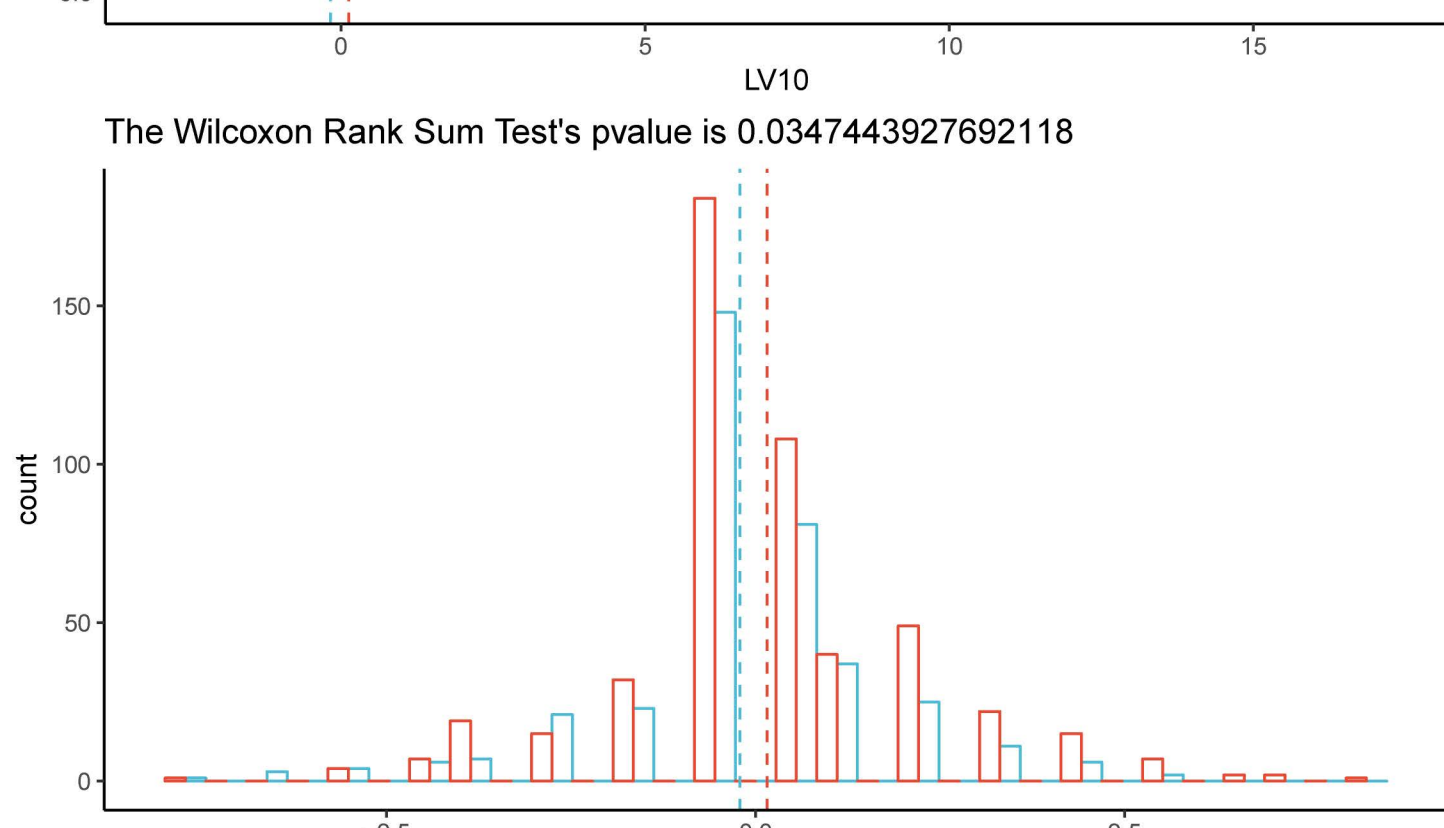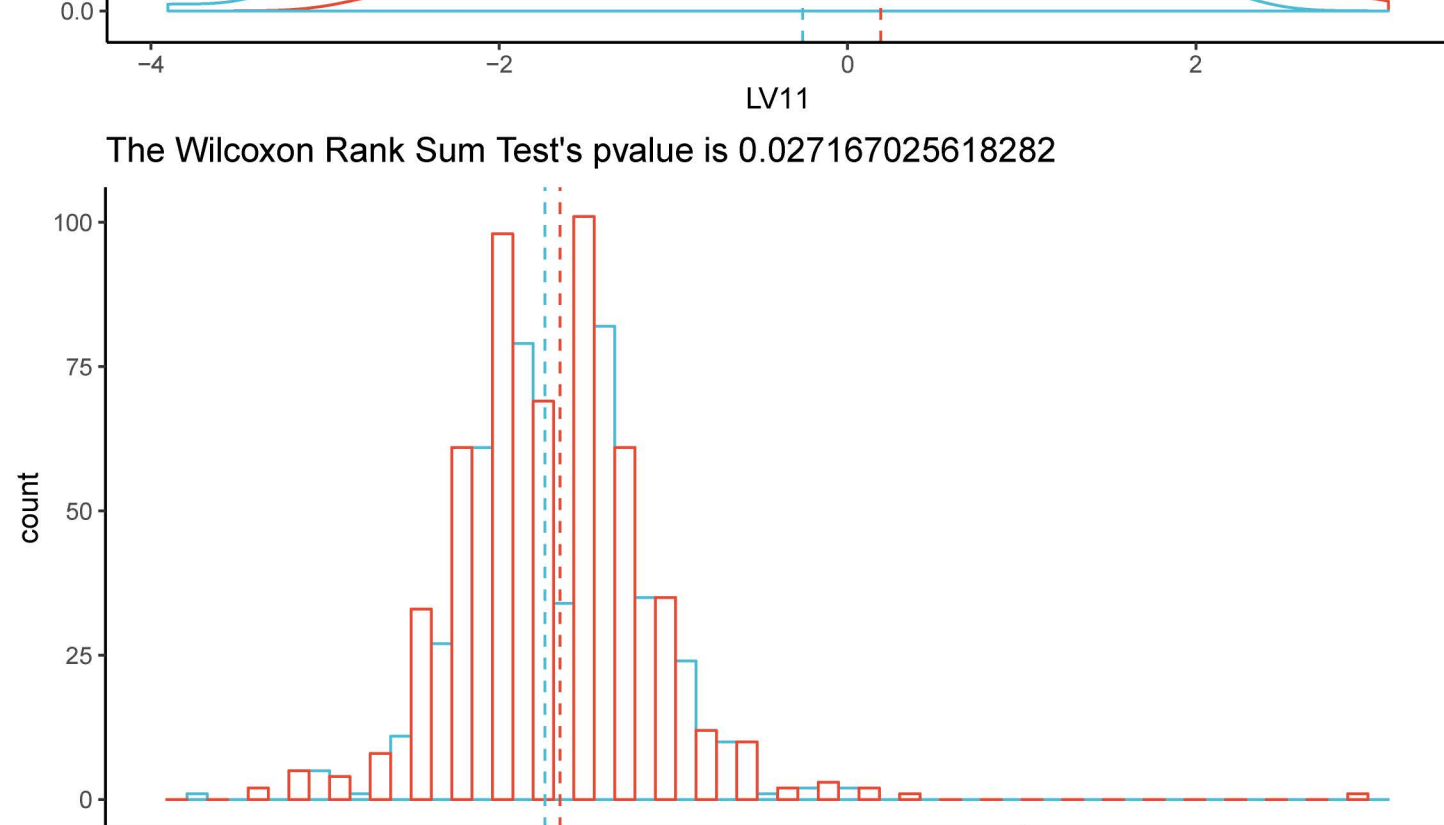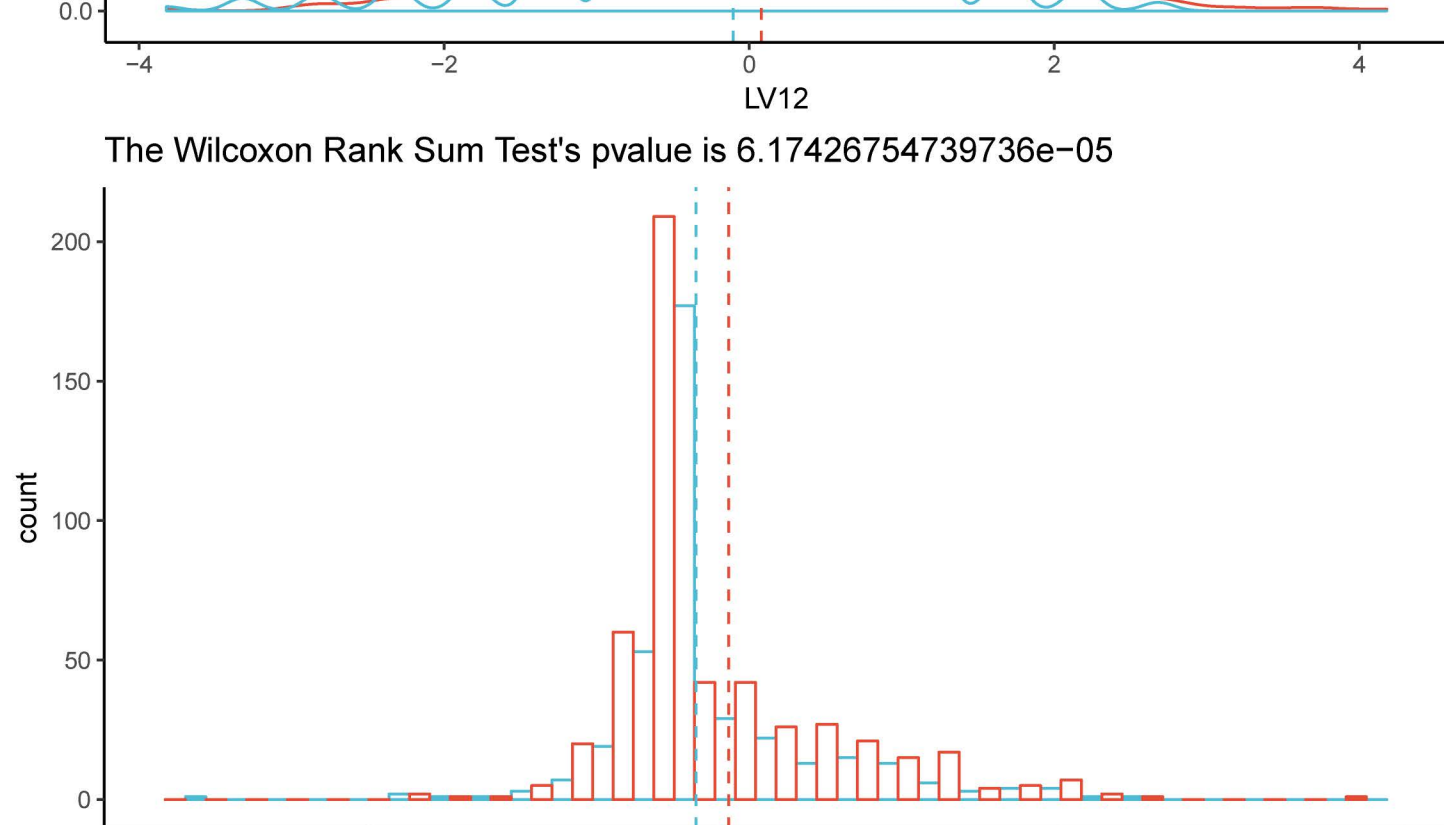

bioRxiv preprint doi: <https://doi.org/10.1101/336446>; this version posted June 12, 2018. The copyright holder for this preprint (which was not certified by peer review) is the author/funder, who has granted bioRxiv a license to display the preprint in perpetuity. It is made available under aCC-BY-NC-ND 4.0 International license.

**Table 1. The 28 physiological traits from 883 Chinese Han young males at baseline and chronic phases of high altitude acclimatization.**

| Variables   | Baseline |       | Chronic |       | Pvalue*          |
|-------------|----------|-------|---------|-------|------------------|
|             | Mean     | Sd    | Mean    | Sd    |                  |
| ALT         | 19.11    | 8.14  | 15.02   | 9.08  | <b>6.28E-45</b>  |
| AST         | 15.64    | 5.83  | 46.05   | 15.24 | <b>2.33E-139</b> |
| AST.ALT     | 0.85     | 0.18  | 3.91    | 2.54  | <b>2.14E-139</b> |
| TBIL        | 11.94    | 1.77  | 14.51   | 24.90 | <b>1.41E-10</b>  |
| DBIL        | 2.69     | 0.61  | 5.70    | 1.70  | <b>3.72E-136</b> |
| IBIL        | 9.25     | 1.24  | 8.81    | 24.95 | <b>1.96E-39</b>  |
| BUN         | 5.08     | 1.12  | 6.21    | 1.17  | <b>3.20E-87</b>  |
| CREA        | 58.32    | 10.38 | 113.02  | 12.20 | <b>2.85E-139</b> |
| WBC         | 6.21     | 1.34  | 8.21    | 1.70  | <b>1.55E-125</b> |
| LYM%        | 36.16    | 7.48  | 40.61   | 10.71 | <b>7.71E-42</b>  |
| LYM#        | 2.21     | 0.52  | 3.31    | 0.99  | <b>1.78E-106</b> |
| RBC         | 4.88     | 0.39  | 5.73    | 0.48  | <b>5.25E-144</b> |
| HGB         | 150.15   | 10.05 | 179.59  | 13.46 | <b>2.07E-144</b> |
| HCT         | 0.44     | 0.03  | 0.50    | 0.04  | <b>1.35E-136</b> |
| MCV         | 90.60    | 5.14  | 87.39   | 4.89  | <b>6.49E-126</b> |
| MCH         | 30.91    | 2.34  | 31.39   | 2.18  | <b>1.16E-21</b>  |
| MCHC        | 341.07   | 17.94 | 359.14  | 16.24 | <b>3.97E-85</b>  |
| PLT         | 206.88   | 42.79 | 258.94  | 51.49 | <b>2.18E-124</b> |
| PCT         | 2.01     | 0.42  | 2.72    | 0.51  | <b>9.95E-139</b> |
| MPV         | 9.78     | 1.26  | 10.54   | 0.62  | <b>9.59E-68</b>  |
| PDW         | 13.79    | 2.25  | 18.03   | 2.53  | <b>9.71E-142</b> |
| FVC         | 444.45   | 38.26 | 412.31  | 59.16 | <b>2.03E-51</b>  |
| SBP         | 110.88   | 10.45 | 124.34  | 12.94 | <b>2.51E-87</b>  |
| DBP         | 73.21    | 8.65  | 75.98   | 9.61  | <b>7.46E-13</b>  |
| HR          | 66.49    | 9.57  | 87.16   | 10.99 | <b>3.24E-123</b> |
| Temperature | 36.22    | 0.12  | 36.38   | 0.29  | <b>1.75E-39</b>  |
| SPO2        | 97.76    | 2.08  | 85.82   | 3.80  | <b>6.64E-132</b> |
| LLS         | 0.88     | 1.59  | 1.40    | 1.73  | <b>1.14E-10</b>  |

\* Pvalues were calculated by Wilcoxon Rank-Sum Test (paired= true).

The significant (under Bonferroni correction) pvalues were shown in bold.

**Table 2. PLSPM composite phenotypes unidimensionality evaluation.**

|             | <b>Biological Meanings</b>  | <b>Manifest variables</b> | <b>Mode</b> | <b>MVs</b> | <b>C.alpha</b> | <b>DG.rho</b> | <b>eig.1st</b> | <b>eig.2nd</b> |
|-------------|-----------------------------|---------------------------|-------------|------------|----------------|---------------|----------------|----------------|
| <b>LV1</b>  | forced vital capacity       | FVC                       | A           | 1          | 1.00           | 1.00          | 1.00           | 0.00           |
| <b>LV2</b>  | heart rate                  | HR                        | A           | 1          | 1.00           | 1.00          | 1.00           | 0.00           |
| <b>LV3</b>  | blood pressure              | SBP, DBP                  | A           | 2          | 0.70           | 0.87          | 1.54           | 0.46           |
| <b>LV4</b>  | immune system               | LYM#, LYM%, WBC           | A           | 3          | 0.55           | 0.77          | 1.76           | 1.21           |
| <b>LV5</b>  | number of red cells         | RBC, HCT, HGB             | A           | 3          | 0.89           | 0.93          | 2.45           | 0.48           |
| <b>LV6</b>  | hemoglobin concentration    | MCH, MCHC, MPV, MCV       | A           | 4          | 0.79           | 0.87          | 2.52           | 1.01           |
| <b>LV7</b>  | number of platelets         | PLT, PCT                  | A           | 2          | 0.94           | 0.97          | 1.88           | 0.12           |
| <b>LV8</b>  | platelet distribution width | PDW                       | A           | 1          | 1.00           | 1.00          | 1.00           | 0.00           |
| <b>LV9</b>  | liver function              | ALT, AST, AST/ALT         | A           | 3          | 0.25           | 0.04          | 1.35           | 1.31           |
| <b>LV10</b> | bilirubin                   | TBIL, DBIL, IBIL          | A           | 3          | 0.59           | 0.79          | 2.00           | 1.00           |
| <b>LV11</b> | renal function              | BUN, CREA                 | A           | 2          | 0.61           | 0.84          | 1.44           | 0.56           |
| <b>LV12</b> | Lake Louise score           | LLS                       | A           | 1          | 1.00           | 1.00          | 1.00           | 0.00           |
| <b>LV13</b> | oxygen saturation           | SPO <sub>2</sub>          | A           | 1          | 1.00           | 1.00          | 1.00           | 0.00           |
| <b>LV14</b> | body temperature            | body temperature          | A           | 1          | 1.00           | 1.00          | 1.00           | 0.00           |

Note: Overall 14 composite phenotypes are shown as the latent variables (**LV1, LV2...LV13, LV14**).



**Table 3. Evaluation the goodness of fit of two multivariate linear regression models.**

|                           | Model1 (original variables) | Model2 (LV)          | Pvalue*        |
|---------------------------|-----------------------------|----------------------|----------------|
| AIC                       | 5089                        | <b>5069</b>          | –              |
| BIC                       | 5227                        | <b>5141</b>          | –              |
| 10 fold CV RMSE           | 4.32                        | <b>4.26</b>          | –              |
| 10 fold CV MSE (SD)       | 18.64 (5.60)                | <b>18.12 (5.71)</b>  | <b>0.00488</b> |
| Leave one out CV RMSE     | 4.32                        | <b>4.265</b>         | –              |
| Leave one out CV MSE (SD) | 18.66 (53.42)               | <b>18.19 (53.32)</b> | <b>0.00294</b> |

\*The Pvalues were calculated by Wilcoxon Rank-Sum Test.

The measurement indices with better fitness were shown in bold.

The significant pvalues (pvalue<0.05) were marked as bold and red color.
